1  
2 **Distinct metabolic states of a cell guide alternate fates of mutational**  
3 **buffering through altered proteostasis**

4 Kanika Verma<sup>1,2,\$</sup>, Kanika Saxena<sup>1,\$,#</sup>, Rajashekar Donaka<sup>1</sup>, Aseem Chaphalkar<sup>1</sup>, Manish Kumar  
5 Rai<sup>1,2</sup>, Anurag Shukla<sup>2,3</sup>, Zainab Zaidi<sup>1</sup>, Rohan Dandage<sup>1,2</sup>, Dhanasekaran Shanmugam<sup>2,3</sup>, Kausik  
6 Chakraborty<sup>1,2\*</sup>

7 <sup>1</sup> CSIR-Institute of Genomics and Integrative Biology, Mathura Road, Delhi, India 110025

8 <sup>2</sup> Academy of Scientific and Innovative Research, CSIR-HRDC, Ghaziabad, Uttar Pradesh,  
9 India-201002

10 <sup>3</sup> CSIR-National Chemical Laboratory, Pashan Road, Pune, India

11 <sup>\$</sup> Equally contributing first authors

12 \*Correspondence address [kausik@igib.in](mailto:kausik@igib.in), [kausik@igib.res.in](mailto:kausik@igib.res.in)

13 <sup>#</sup>Institute of Biomedicine, University of Gothenburg, Medicinaregatan 7A, Gothenburg, Sweden

14

15

16 **Summary**

17 Changes in metabolism can alter the cellular milieu; can this also change intracellular  
18 proteostasis? Since proteostasis can modulate mutational buffering, if change in metabolism has  
19 the ability to change proteostasis, arguably, it should also alter mutational buffering. Building on  
20 this, we find that altered cellular metabolic states in *E. coli* buffer distinct mutations. Buffered-  
21 mutants had folding problems *in vivo* and were differently chaperoned in different metabolic  
22 states. Notably, this assistance was dependent upon the metabolites and not on the increase in  
23 canonical chaperone machineries. Additionally, we were able to reconstitute the folding  
24 assistance afforded by metabolites *in vitro* and propose that changes in metabolite concentrations  
25 have the potential to alter proteostasis. Collectively, we unravel that the metabolite pools are  
26 bona fide members of proteostasis and aid in mutational buffering. Given the plasticity in  
27 cellular metabolism, we posit that metabolic alterations may play an important role in positive or  
28 negative regulation of proteostasis.

29

30

31 Metabolic rewiring is a common response among different organisms to their surrounding  
32 environment<sup>1</sup>. Different cell types differ in their preferred mode of metabolism in order to  
33 harness energy and generate its required set of metabolites<sup>2-5</sup>. It is also known to change with age  
34 and in case of metabolic diseases<sup>6</sup>. Since aging is associated with proteostasis defects, it is  
35 important to ask if change in metabolite composition of cellular milieu can alter intracellular  
36 protein folding capacity.

37 If metabolites and metabolism can affect proteostasis it may have two fundamental implications.  
38 1) Metabolism-dependent change in proteostasis may aid evolution of the whole proteome when  
39 there is change in an organism's niche or surrounding climate, which alters its internal  
40 environment, or when an organism undergoes a large change in metabolism<sup>5,7</sup>. For example,  
41 some mutations may be rendered inactive in one metabolic state (a metabolic state is defined by  
42 the concentration of each of the metabolites the cell accumulates), while being active in a  
43 different one. Switching of metabolic niches may expose certain phenotypes that are hidden by  
44 metabolism-dependent genetic buffering. 2) tissue-specific metabolic differences may predispose  
45 cell-types to aggregate or misfold particular mutant protein, even while the protein is  
46 ubiquitously expressed. Age-dependent change in metabolism may also render certain tissues  
47 more prone to age-dependent aggregation<sup>8,9</sup>. This has important implications in explaining the  
48 late-onset tissue specificity of aggregation associated disorders<sup>10</sup> which has been hard to explain  
49 with our current understanding of proteostasis components.

50 Given the immediate importance of the second implication, the question should be asked with  
51 human diseases in mind<sup>11</sup>. However, given that metabolism is intricately linked to regulation of  
52 molecular chaperones through nutrient-signaling (TOR, gcn2, AMPK and so on) it is difficult to  
53 pin-point any proteostasis differences found in eukaryotic models to cellular milieu<sup>12-15</sup>. It will  
54 be hard to exclude the role of canonical molecular chaperones, autophagy or translation related  
55 mechanisms that are extensively studied<sup>16-18</sup>. Although these systems are extremely important in  
56 explaining cellular quality control, complexity of these machineries renders unmasking the role  
57 of cellular milieu in proteostasis a daunting task. In addition, the growth conditions for cell lines  
58 (specifically non-cancerous and untransformed cells needed in the study) are hardly defined.  
59 This places a limitation in understanding or altering metabolism in defined directions.

60 In order to address this fundamental question, we needed a bare minimum framework, an *in vivo*  
61 test tube, to test this possibility. We chose *E. coli* as it is well characterized in terms of its  
62 metabolic network, its chaperone content and the network of chaperones that work in the  
63 cytosol<sup>19,20</sup>. It also has few defined mechanisms to upregulate chaperones, which do not typically  
64 overlap with metabolism. We use this model and a newly devised assay to address the possibility  
65 of metabolism affecting mutational buffering.

66 While many studies have shown mixed results in terms of buffering by molecular chaperones-  
67 the proteins that aid in folding<sup>21-25</sup>, remarkably little is known regarding role of cellular chemical  
68 milieu in proteostasis and mutational buffering. Previously we have shown that addition of small  
69 molecules at large concentrations in growth media leads to mutational buffering. Interestingly,  
70 the type of mutations buffered depended on the nature of the small molecule as different small  
71 molecules have different mechanisms to aid protein folding<sup>26</sup>. This indicated that molecular  
72 evolution can take different routes if different molecules are present in the growth media<sup>27</sup>.  
73 However, we do not understand if the physiological concentrations of metabolites present inside  
74 the cell affect protein folding and mutational buffering.

75 Osmolytes are abundant in cells and cells respond to osmotic shock by rewiring metabolism<sup>7,28</sup>  
76 which allows them to accumulate compensatory osmolytes<sup>29</sup>. Osmolytes also influence protein  
77 stability *in vitro*<sup>27,30-33</sup>. We hypothesized that change in osmotic composition of a cell may thus  
78 change protein folding, and hence mutational buffering. To test this, we used strains with altered  
79 level of certain osmolytes and monitored their potential to buffer mutations in two model  
80 proteins. Indeed the mutational buffering capacity was altered when the metabolite pools were  
81 altered. Interestingly, buffering capacity of the same strain in different metabolic states was  
82 different. In all cases mutational buffering was only evident for mutations that impair folding,  
83 corroborating the link between proteostasis and genetic buffering. Remarkably, the metabolites  
84 that change along with buffering capacity were able to aid protein folding *in vitro*, suggesting a  
85 strong link between metabolite-assisted protein folding and genetic buffering. Finally we proved  
86 the link between metabolic state and mutational buffering by evolving strains of *E. coli* with  
87 enhanced osmotic tolerance. These strains showed similar altered buffering capacity as seen for  
88 metabolically compromised cells, highlighting that protein folding environment is different in

89 different metabolic states. We propose that metabolic alterations can have far-reaching  
90 consequences on mutational buffering through their influence on proteostasis.

91

## 92 **Results**

### 93 **Altered metabolite uptake leads to differences in mutational buffering**

94 To elucidate if metabolic rewiring changes capacity to buffer mutations, we used two model  
95 proteins - Gentamicin-acetyl transferase (GmR, confers gentamicin resistance)<sup>34</sup> and Green  
96 Fluorescence Protein (GFP - yeast enhanced variant)<sup>35</sup>. These proteins met a few essential  
97 requirements. 1) Employing these model proteins we could monitor the activity of multiple  
98 mutants simultaneously. 2) These proteins are non-endogenous to *E. coli* and their activity is  
99 largely independent of endogeneous *E. coli* gene regulatory network except for the proteostasis  
100 network that takes care of its biogenesis and degradation. It ensured that altered buffering of  
101 different mutants of the proteins in different conditions is indeed an alteration in general  
102 mutational buffering capacity of *E. coli*. 3) The two proteins are unique protein-folds,  
103 presumably with different folding requirements. This enabled us to provide a fold-independent  
104 generality to the observations. 4) GFP was amenable to *in vitro* protein folding studies, helping  
105 us to reconstitute the buffering activities *in vitro*.

106 To generate a comprehensive map of mutational buffering, we developed massively-parallel  
107 activity assays to quantitate protein activity of a large number of mutants of the test proteins.  
108 Since Gm-R confers resistance to Gentamicin (Gm), we modified and developed a high  
109 throughput assay to quantitate protein activity using deep-mutational scanning<sup>36</sup>. We used a  
110 Glycine doublet mutant library for this protein<sup>26</sup>(Figure **1A and S1A**). For the second test protein  
111 GFP, where we could isolate clones with different levels of GFP fluorescence, we used a random  
112 mutant library of GFP. Quantification of the intracellular folded fraction of GFP was done using  
113 flow-cytometry. Wt mCherry was expressed along with GFP as a bicistronic construct to control  
114 for differences in promoter activity and plasmid number (Figure **1B**).

115 To obtain *E. coli* strains with altered metabolism, we chose the strain CSH4<sup>37</sup> and a mutant strain  
116 on this background deleted of Proline and Glycine-betaine uptake transporters (WG350) (see  
117 Key resource table)<sup>38</sup>. We chose this mutant as it is more osmosensitive than CSH4 (Figure **S1B**)

A

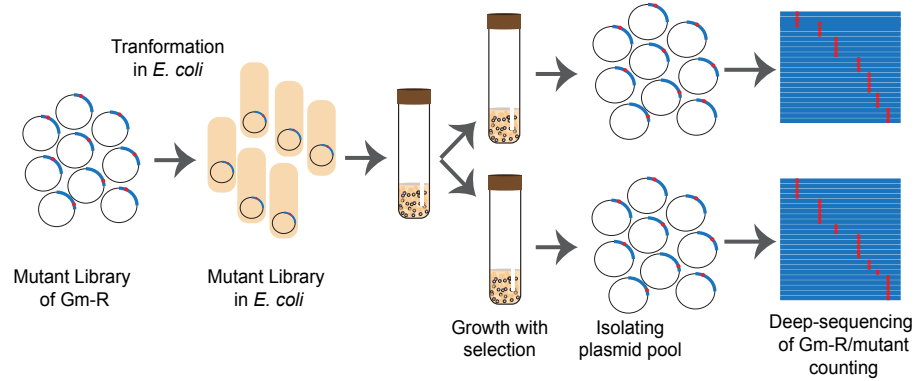

B

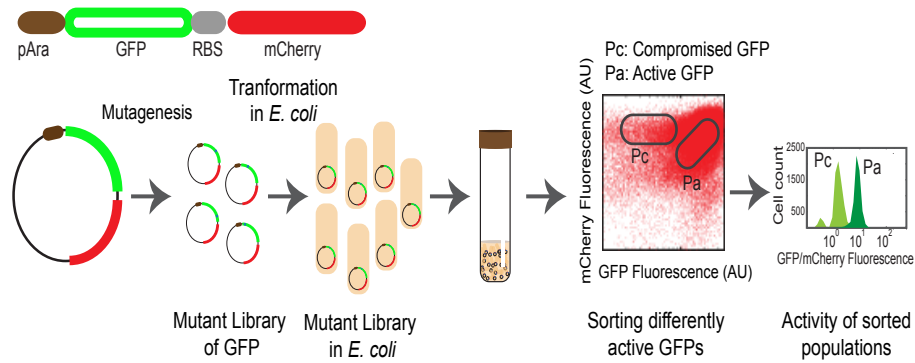

C

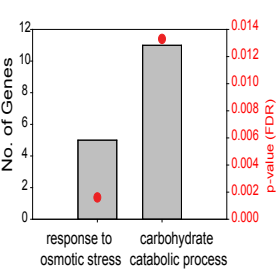

D

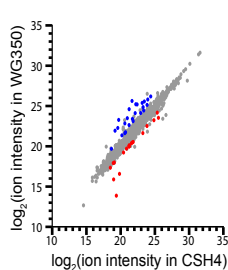

E

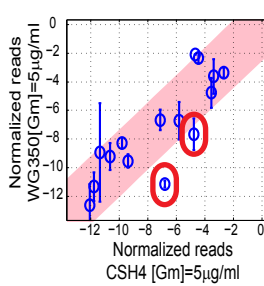

F

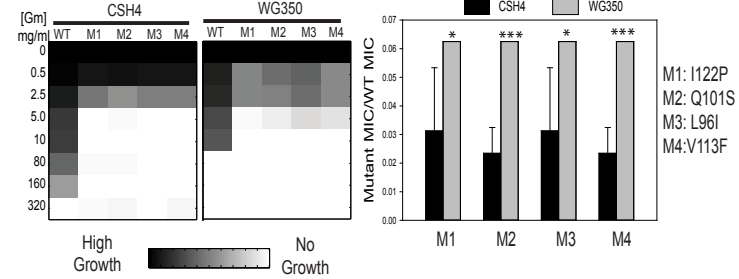

## Figure 1: Genetic alteration in cellular metabolism changes mutational buffering

**A.** Schematic for highthroughput activity assay for Glycine-doublet substitution (GG-mutant) library of Gm-R. Activity of Gm-R mutants are inferred from the competitive fitness of the mutants in presence of Gm-selection. The competitive fitness for each of the mutants is quantified by deep-sequencing.

**B.** Schematic of highthroughput activity assay for GFP mutant library. The bi-cistronic construct of GFP and mCherry is driven by an arabinose inducible promoter. RBS indicates the position of the additional Ribosome Binding Site for translation of mCherry to serve as internal control. Mutations are created on GFP using random mutagenesis with GFP specific primers. Pool of GFP mutants are sorted into population of compromised mutants (Pc) and active mutants (Pa) based on GFP Fluorescence.

**C.** Gene Ontology (GO) classes that were upregulated in WG350 transcriptome with respect to CSH4. The fold enrichment is shown on the left-axis and Benjamini-Hochberg FDR corrected p-values for the enrichment score is shown on the right axis.

**D.** Comparison of metabolic features measured in WG350 and CSH4 using untargeted metabolomics. Metabolites features that are significantly different between CSH4 and WG350 are represented as colored circles (p-value < 0.05, 5 biological replicates for each sample).

**E.** Normalized read counts of Gm-R GG-mutant library at comparative selective pressures in the presence of the antibiotic gentamycin (Gm). Pink shaded area marks the 99% confidence interval. Mutants marked in red show lower read-counts in WG350 than in CSH4.

**F.** Left is a heat map representing growth of four Gm-R mutants in WG350 and in CSH4 along with Wt Gm-R in increasing concentration of Gm. Right panel shows the MIC of each of the mutants normalized with respect to Wt GmR in the respective strains. Error bars are representative of standard deviation from 4 biological replicates. Significance is calculated using student's t-test with respect to CSH4.

Also see Figure S1

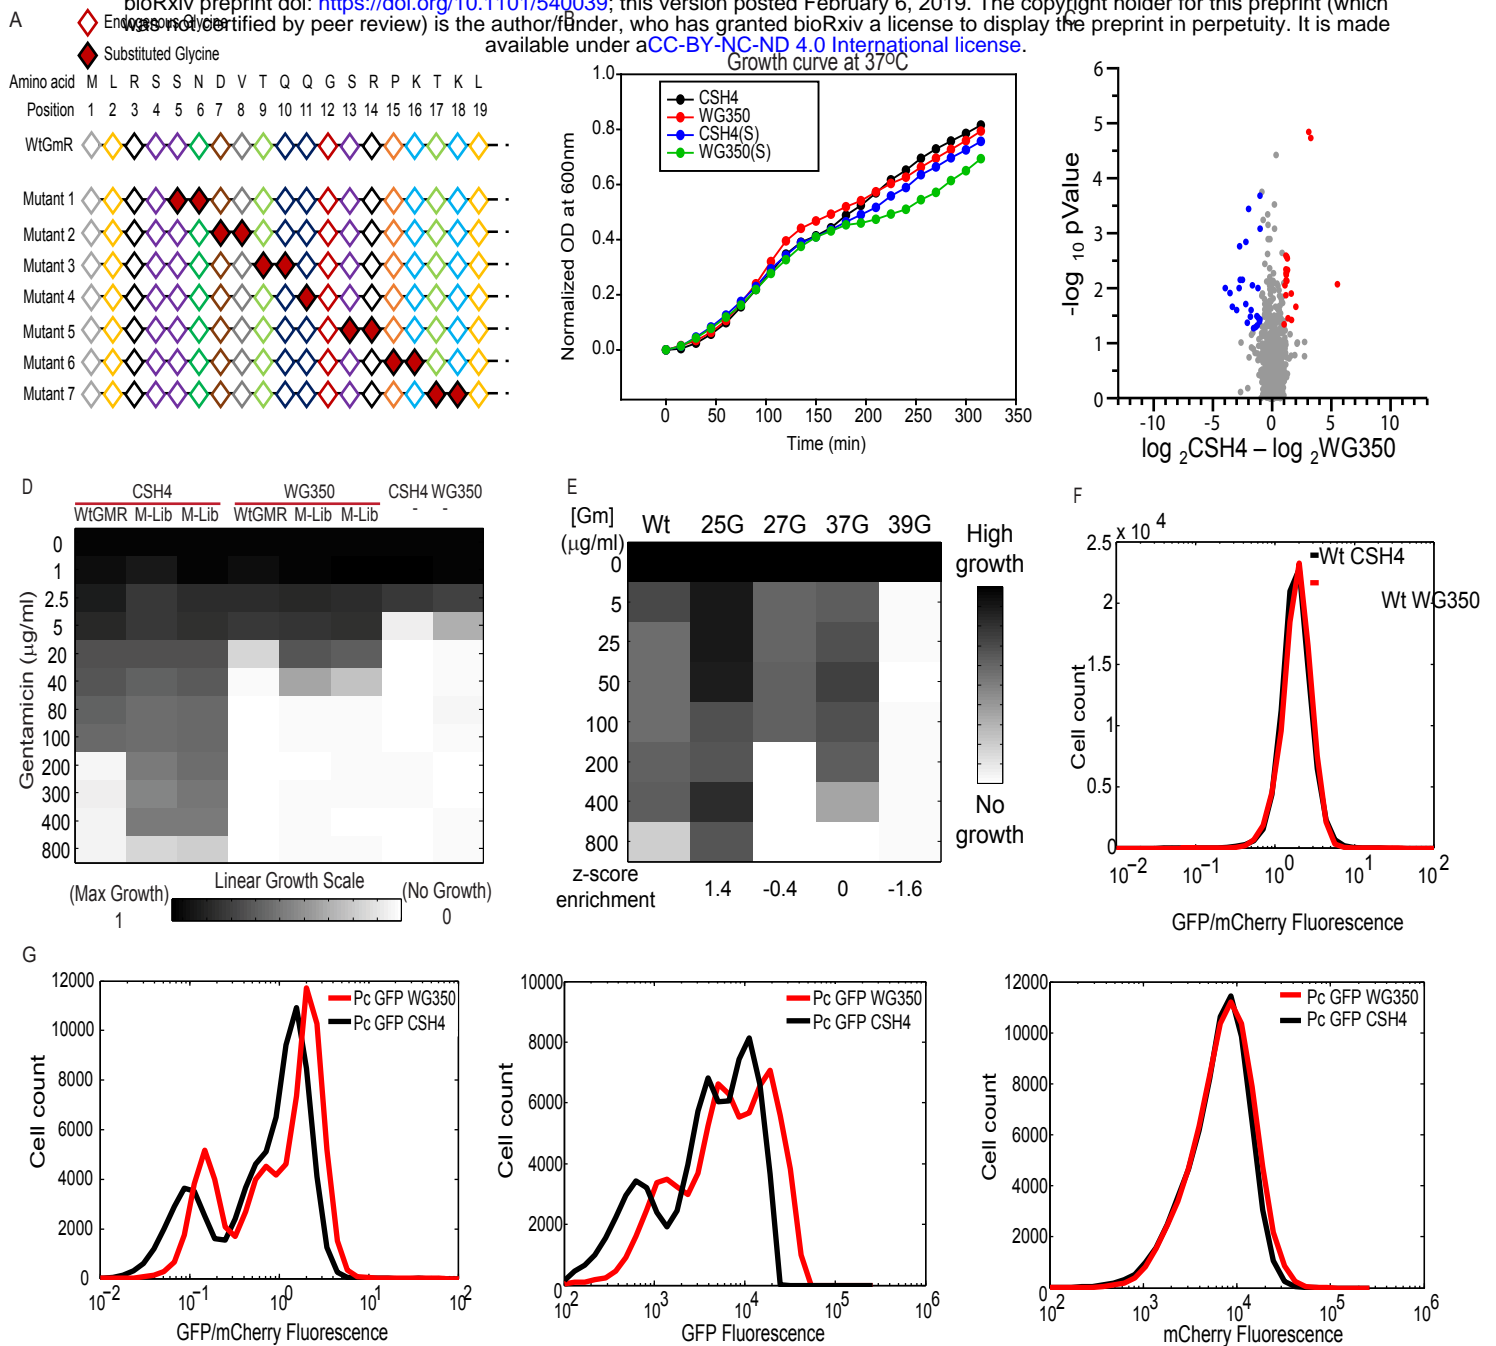

**FIGURE S1: Strain specific metabolic differences lead to differential mutation buffering capacity (Related to Figure 1)**

- A.** Schematic of Glycine doublet substitution library (GG) of Gm-R mutants where two consecutive amino acids have been substituted with two Glycine residues (red solid filled) starting from 5th amino acid.
- B.** Growth curve for E.coli strains CSH4 (black, blue) and WG350 (red, green) in presence and absence of 350 mM NaCl added in excess to the LB media while growing at 37°C.
- C.** Scatter plot for log<sub>2</sub> of fold change in metabolite concentrations between CSH4 and WG350 against -log<sub>10</sub> of p-value. The significantly altered metabolites (p-value < 0.05, 5 biological replicates for each sample) are shown in colored circles
- D.** Growth of untransformed CSH4 (-), WG350 (-) and cells transformed with Wt Gm-R and Glycine doublet mutant library plasmids (M-Lib) in increasing concentrations of Gentamicin (0-800mg/ml). Increase in growth is shown as increase in color density.
- E.** Correlation between NGS based quantification of enrichment scores (z-score) and MIC based semi-quantitative activity measurement for Wt Gm-R and mutants 25-26G, 27G, 37-38G, 39-40G of Glycine doublet mutant library.
- F.** Histogram for in vivo fluorescence of Wt GFP (represented as ratio of GFP/mCherry) in CSH4 (black) and WG350 (red)
- G.** Histogram for ratio of GFP/mCherry fluorescence and independent fluorescence of GFP and mCherry channel of mutant library Pc in CSH4 and WG350.

118 suggesting altered concentration of intracellular osmolytes; this served as an experimental model  
119 for alteration in its metabolism and osmolyte composition. To validate that deletion of uptake-  
120 transporters altered metabolism in the mutant strain we obtained the mRNAs differentially  
121 expressed between WG350 and CSH4 using RNA-seq; differentially expressed mRNAs were  
122 significantly enriched for genes encoding metabolic enzymes (Figure 1C). To substantiate if the  
123 strains differed in terms of metabolite concentrations, we obtained untargeted metabolite profile  
124 for both the strains (Figure 1D, S1C). The strains differed in terms of some of the metabolic  
125 features (43 metabolites with p-value <0.05). For example the metabolic features corresponding  
126 to Trehalose and Trehalose-6-Phosphate increased in WG350 compared to CSH4 by ~3 and ~4-  
127 fold, respectively (Table S1). Proline and Betaine, although the transporters were deleted in  
128 WG350, were only marginally lower (insignificant) in WG350 compared to CSH4 (Table S1),  
129 indicating the cellular biosynthetic processes are switched on in the absence of transporters. This  
130 demonstrates that cellular metabolism is rewired significantly upon deletion of transporters of  
131 Proline and Glycine-betaine. Taken together metabolism in CSH4 and WG350 strains were  
132 significantly different; this provided us the platform to ask if mutational buffering differed  
133 between these strains that differed in metabolism.

134 To check for mutational buffering we transformed both the strains with Gm-R Glycine-duplet  
135 substitution (GmR-GG) library and grew them at similar selection pressure (see star methods for  
136 details) in the presence of Gentamicin (Gm) (Figure S1D). To check for mutation-specific effects  
137 it was important to normalize Minimal Inhibitory Concentrations (MICs) of the mutants with  
138 respect to that of Wt Gm-R as Wt Gm-R transformed WG350 was more sensitive to Gm than  
139 CSH4 with Wt Gm-R (Figure S1D). Mutant pools were sequenced and analyzed to obtain  
140 abundance of the different mutants in the presence or absence of selection pressure (Gentamicin  
141 in growth medium). Enrichment scores in the presence of Gm selection were calculated to  
142 quantitate their activity as previously published<sup>36</sup>. Enrichment scores (a measure of activity) of a  
143 chosen set of partially active and inactive mutants as identified with this assay, correlate well  
144 with the semi-quantitative measurements of activity as obtained by minimum-inhibitory  
145 concentration (MIC) of Gm in presence of each of these mutants (Figure S1E). Two of the Gm-  
146 R mutants (Gm-R (25G,26G) and Gm-R (27G)) were less active in WG350 than in CSH4,  
147 indicating mutation-specific differences buffering (Figure 1E). We confirmed that  
148 transcription/translation were not different in these strains using a GFP/mCherry system that is



149 driven by the same promoter (**Figure S1F**). Remarkably, another set of small molecule  
150 dependent Gm-R mutants used in a previous study<sup>26</sup> revealed higher activity wrt Wt Gm-R in  
151 WG350 than in CSH4 (**Figure 1F**). This underlined that WG350 does not have a lower capacity  
152 to fold mutant proteins, but has a different spectrum of buffered mutants compared to CSH4.

153 For the second test protein with a completely different fold, we purified a population of GFP  
154 mutants (compromised fluorescence, Pc) that show lower GFP fluorescence compared with Wt  
155 GFP in the WT E. coli strain BW25113 (referred to as BW henceforth). Mutant pool Pc had  
156 similar fluorescence in CSH4 and WG350 strains (**Figure S1G**), demonstrating that the  
157 difference between the strains in buffering mutations is protein-specific. Taken together, this  
158 suggests that the ability to take up metabolites from the medium affects metabolic network and  
159 mutational buffering. This change the spectrum of mutations buffered in a protein-specific  
160 manner.

#### 161 **Different metabolic states of the same cell show differences in buffering capacity**

162 Next we asked if altering metabolite pool in the same strain backgrounds change mutational  
163 buffering. Since osmotic shock alters the metabolite pool facilitating the accumulation of  
164 osmotically active metabolites<sup>28</sup>, we grew the strains WG350 and CSH4 in 350mM NaCl to  
165 change the metabolic status of the cell. We obtained transcriptomic (**Figure 2A**) and  
166 metabolomic shifts (**Figure 2B, S2A**) associated with osmotic shock in each of the strain.  
167 Osmotic shock altered metabolism in both the strains (**Figure 2C, S2B**) but were routed  
168 differently in the two strains. For example, Fructose 1,6-bisphosphate was strongly upregulated  
169 in CSH4 upon osmotic shock but not in WG350, contrastingly, Succinate was upregulated in  
170 WG350 but not in CSH4 upon osmotic stress (**Table S1**). Interestingly, the osmotic adaptation of  
171 CSH4 and WG350 strains led to a marked similarity in terms of their potential to buffer di-  
172 glycine mutations in Gm-R (**Figure 2D**). Gm-R(25G,26G) and Gm-R(27G,28G), mutants less  
173 active in WG350 than in CSH4, show similar activity in these strains in the presence of NaCl in  
174 the growth medium. The GG-mutants of Gm-R that showed enhanced activity in WG350  
175 compared to CSH4, shows a noticeably smaller difference or similar activity in both the strains  
176 during osmotic shock (**Figure 2E**). This rules out the canonical effect of osmotic stress induced  
177 aggregation in affecting buffering under the conditions used here. Notably, buffering capacity of  
178 WG350 and CSH4 towards Gm-R was similar although the osmotic composition of the strains in

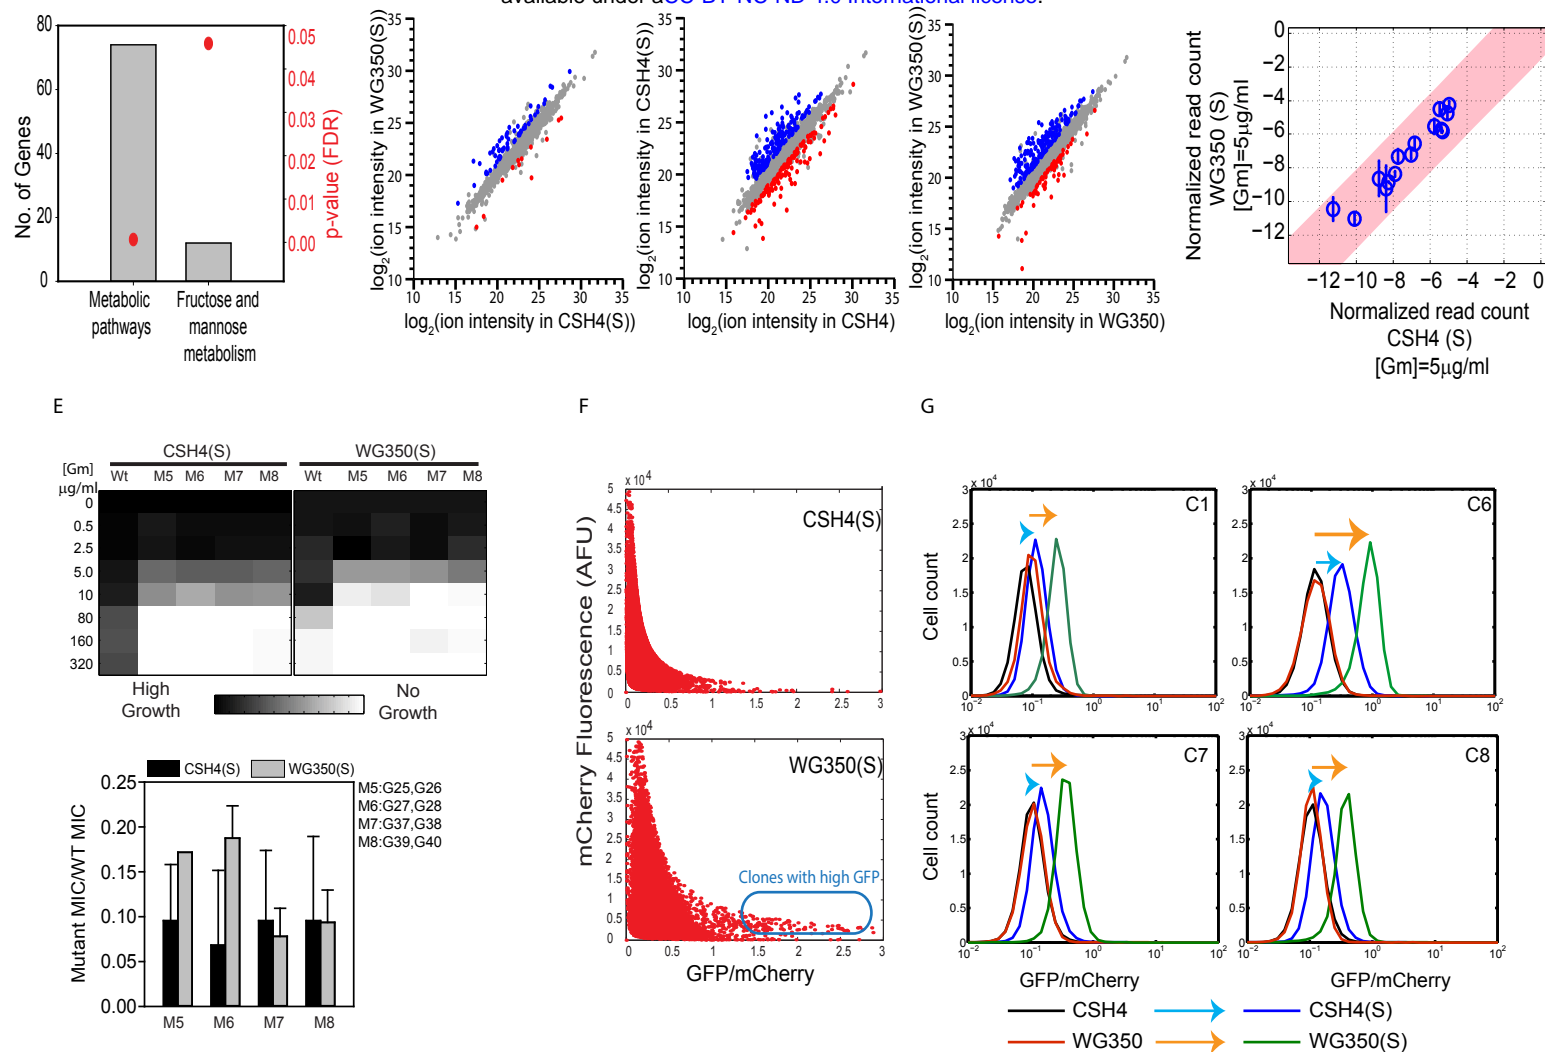

**Figure 2: Osmotic stress-induced changes in metabolism changes the spectrum of mutants buffered**

**A.** Gene Ontology (GO) classes that were upregulated in WG350 transcriptome with respect to CSH4 during osmotic shock. The fold enrichment is shown on the left-axis and Benjamini-Hochberg FDR corrected p-values for the enrichment score is shown on the right axis.

**B.** Comparison of metabolic features measured in WG350 and CSH4 during growth in media containing 350mM NaCl using untargeted metabolomics. The significantly different metabolites ( $p$ -value  $< 0.05$ , 5 biological replicates for each sample) are represented in colored circles.

**C.** Comparison of metabolic features within strain in presence and absence of 350mM NaCl in growth media. The significantly different metabolites ( $p$ -value  $< 0.05$ , 5 biological replicates for each sample) are represented in colored circles.

**D.** Normalized read counts of Gm-R GG-mutant library at comparative selective pressures in the presence of the antibiotic Gentamicin (Gm) and 350mM NaCl in the growth media. Pink shaded area marks the 99% confidence interval.

**E.** Left panel shows heat map representing activity (in terms of growth) of mutants described earlier (see Figure 1E) in CSH4 and WG350 grown in presence of 350mM NaCl and different concentration of Gm. Right panel shows the MIC of each of the mutants normalized with respect to Wt-GmR in the respective strains. Error bars are representative of standard deviation from 4 biological replicates.

**F.** Single cell fluorescence for the partially active pool of GFP mutants (Pc). The scatter plot for mCherry Vs GFP/mCherry fluorescence is shown for Pc in WG350 and CSH4 when grown in the presence of 350mM NaCl added in excess to the LB growth medium. Clones with high GFP fluorescence during osmotic stress in WG350 are indicated by the blue box.

**G.** Histogram of GFP/mCherry fluorescence of the isolated clones (C1, C6, C7, and C8) in WG350 and CSH4 in the presence and absence of 350mM NaCl. The shift in the ratio due to osmotic shock is shown with colored arrows. The cyan arrow indicates increase/decrease in GFP fluorescence upon addition of 350mM NaCl to CSH4 strain, the orange arrow indicates the same for WG350.

Also see Figure S2

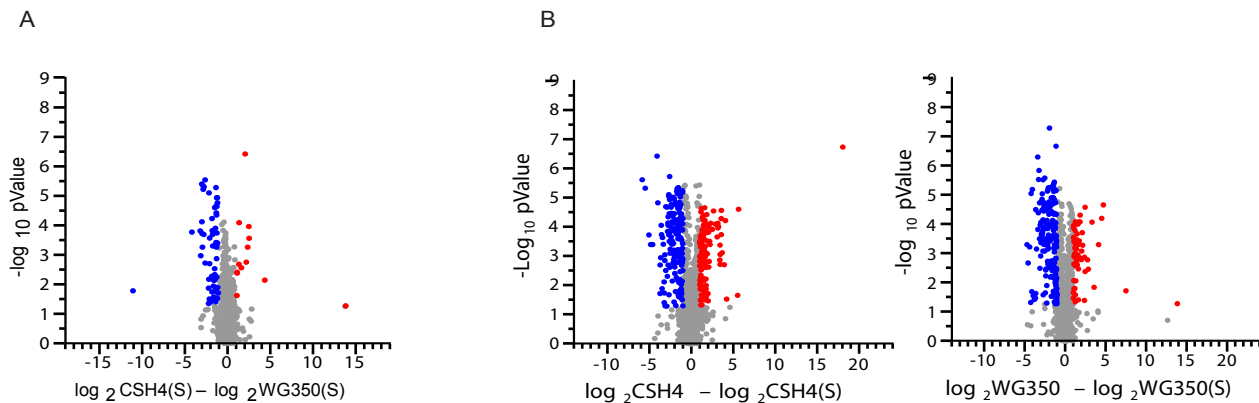

**C**

|       |                                                               |     |
|-------|---------------------------------------------------------------|-----|
| wt    | MSKGEELFTGVVPIVLVDGDNVNGHKFSVSGEGEGDATYGKLLTKFICTTGKLPVPWPTL  | 60  |
| c1    | MSKGEELFTGVVPIVLVDGDNVNC HKFSVSGEGEGDATYGKLLTKFICTTGKLPVPWPTL | 60  |
| c6    | MSKGEELFTGVVPIVLVDGDNVNGHKFSVSGEGEGDATYGKLLTKFICTTGKLPVPWPTL  | 60  |
| c7    | MSKGEELFTGVVPIVLVDGDNVNC HKFSVSGEGEGDATYGKLLTKFICTTGKLPVPWPTL | 60  |
| c8    | MSKGEELFTGVVPIVLVDGDNVNC HKFSVSGEGEGDATYGKLLTKFICTTGKLPVPWPTL | 60  |
| ***** |                                                               |     |
| wt    | VTTFGYGVQCFARYPDHMKQHDFFKSAMPEGYVQERTIFFKDDGNYKTRAEVKFEGDTLV  | 120 |
| c1    | VTTFGYGVQCFARYPDHMKQHDFFKSAMPEGYVQERTIFFKDDGNYKTRAEVKFEGDTLV  | 120 |
| c6    | VTTFGYGVQCFARYPDHMKQHDFFKSAMPEGYVQERTIFFKDDGNYKTRAEVKFEGDTLV  | 120 |
| c7    | VTTFGYGVQCFARYPDHMKQHDFFKSAMPEGYVQERTIFFKDDGNYKTRAEVKFEGDTLV  | 120 |
| c8    | VTTFGYGVQCFARYPDHMKQHDFFKSAMPEGYVQERTIFFKDDGNYKTRAEVKFEGDTLV  | 120 |
| ***** |                                                               |     |
| wt    | NRIELKGIDFKEDGNILGHKLEYNYNSHNVYIMADKQKNGIKVNFKIRHNIEDGSVQLAD  | 180 |
| c1    | NRIELKGIDFKEDGNILGHKLEYNYNSHNVYIMADKQKNGIKVNFKIRHNIEDGSVQLAD  | 180 |
| c6    | NRIELKGIDFKEDGNILGHKLEYNYNSHNVYIMADKQKNGIKVNFKIRHNIEDGSVQLAD  | 180 |
| c7    | NRIELKGIDFKEDGNILGHKLEYNYNSHNVYIMADKQKNGIKVNFKIRHNIEDGSVQLAD  | 180 |
| c8    | NRIELKGIDFKEDGNILGHKLEYNYNSHNVYIMADKQKNGIKVNFKIRHNIEDGSVQLAD  | 180 |
| ***** |                                                               |     |
| wt    | HYQQNTPIGDGPVLLPDNHYLSTQSALS KDPNEKRDHMLLEFVTAAGITHGMDELYK    | 238 |
| c1    | HYQQNTPIGDGPVLLPDNHYLSTQSALS KDPNEKRDHMLLEFVTAAGITHGMDELYK    | 238 |
| c6    | HYQQNTPIGDGPVLLPDNHYLSTQSALS KDPNEKRDHMLLEFVTAAGITHGMDELYK    | 238 |
| c7    | HYQQNTPIGDGPVLLPDNHYLSTQSALS KDPNEKRDHMLLKFVTAAGITHGMDELYK    | 238 |
| c8    | HYQQNTPIGDGPVLLPDNHYLSTQSALS KDPNEKRDHMSLLEFVTAAGITHGMDELYK   | 238 |
| ***** |                                                               |     |

**FIGURE S2: Osmotic stress induced modification in cellular metabolism changes the subset of mutations buffered (Related to Figure 2)**  
**A.** Scatter plot for log2 of fold change in metabolic features between WG350 and CSH4 during osmotic shock against p-value. The significantly different metabolites (p-value < 0.05, 5 biological replicates for each sample) are represented in colored circles.  
**B.** Scatter plot for log2 of fold change in metabolic features within strains CSH4 (left) and WG350 (right) on osmotic shock(s) against p-value. The significantly different metabolites (p-value < 0.05, 5 biological replicates for each sample) are represented in colored circles.  
**C.** Amino acid sequence alignment of Wt GFP (YeGFP) with the isolated mutants C1, C6, C7, C8. Mutations are shown in red boxes.

179 the presence of the salt is different. This indicates that compensatory mechanisms may work  
180 through different metabolic pathways to reinstate similar spectrum of mutational buffering.

181 Since metabolite composition of WG350 and CSH4 were different in the presence of salt, and it  
182 is known that different small molecules have protein- and mutation-specific effects<sup>27</sup>, we asked  
183 if there could be difference in mutational buffering for a different protein. Indeed mutational  
184 buffering of these strains during osmotic shock is different for the GFP mutant library (although  
185 for Gm-R it was the same) (**Figure 2F**). We could identify multiple clones of GFP that showed  
186 enhanced fluorescence in WG350 compared to CSH4 in the presence of osmotic shock. This  
187 clearly shows that the activity of these GFP mutants are enhanced in this altered osmotic  
188 condition. In order to validate the observed buffering, we isolated single clones from the pool  
189 using FACS and sequenced them. The clones segregated into two clusters; the first cluster  
190 contained a common mutation G24C while the second cluster with only one clone was devoid of  
191 this mutation (**Figure S2C**). Upon retransformation, each of these mutants exhibited similar  
192 fluorescence in CSH4 and WG350 in normal growth media while their fluorescence increased in  
193 osmotic stress (**Figure 2G**). Notably, these exhibited not only higher fluorescence in WG350  
194 than in CSH4 in the presence of osmotic shock but different mutants were buffered to different  
195 extent in WG350 under osmotic stress. Hence, these clones confirm that difference in mutational  
196 buffering capacity of a strain is protein specific. Taken together, the evidences suggest that the  
197 alterations in cellular metabolism changes buffering capacity.

### 198 **Mutational buffering is affected through altered proteostasis**

199 Having obtained different clones of GFP we asked if mutational buffering has contribution from  
200 altered proteostasis. The mutations did not map close to the fluorophore of GFP suggesting that  
201 the fluorescence *per se* was not altered (**Figure S3A**). *In vitro* fluorescence of the purified  
202 mutants was similar to that of Wt GFP (**Figure 3A**) confirming that the mutations did not affect  
203 fluorescence of the folded proteins. Refolding studies of the purified proteins showed that the  
204 proteins have severely reduced refolding rate compared to the Wt protein (**Figure 3B**). Except  
205 for C6, the apparent rates for refolding were ~2 to ~10 fold lower than the refolding rates of Wt  
206 GFP (**Figure 3B**). This demonstrated that the mutants isolated were indeed folding-compromised  
207 mutants, thus differences in their *in vivo* fluorescence in different strains and conditions may  
208 reflect the differences in proteostasis capacities between strains.

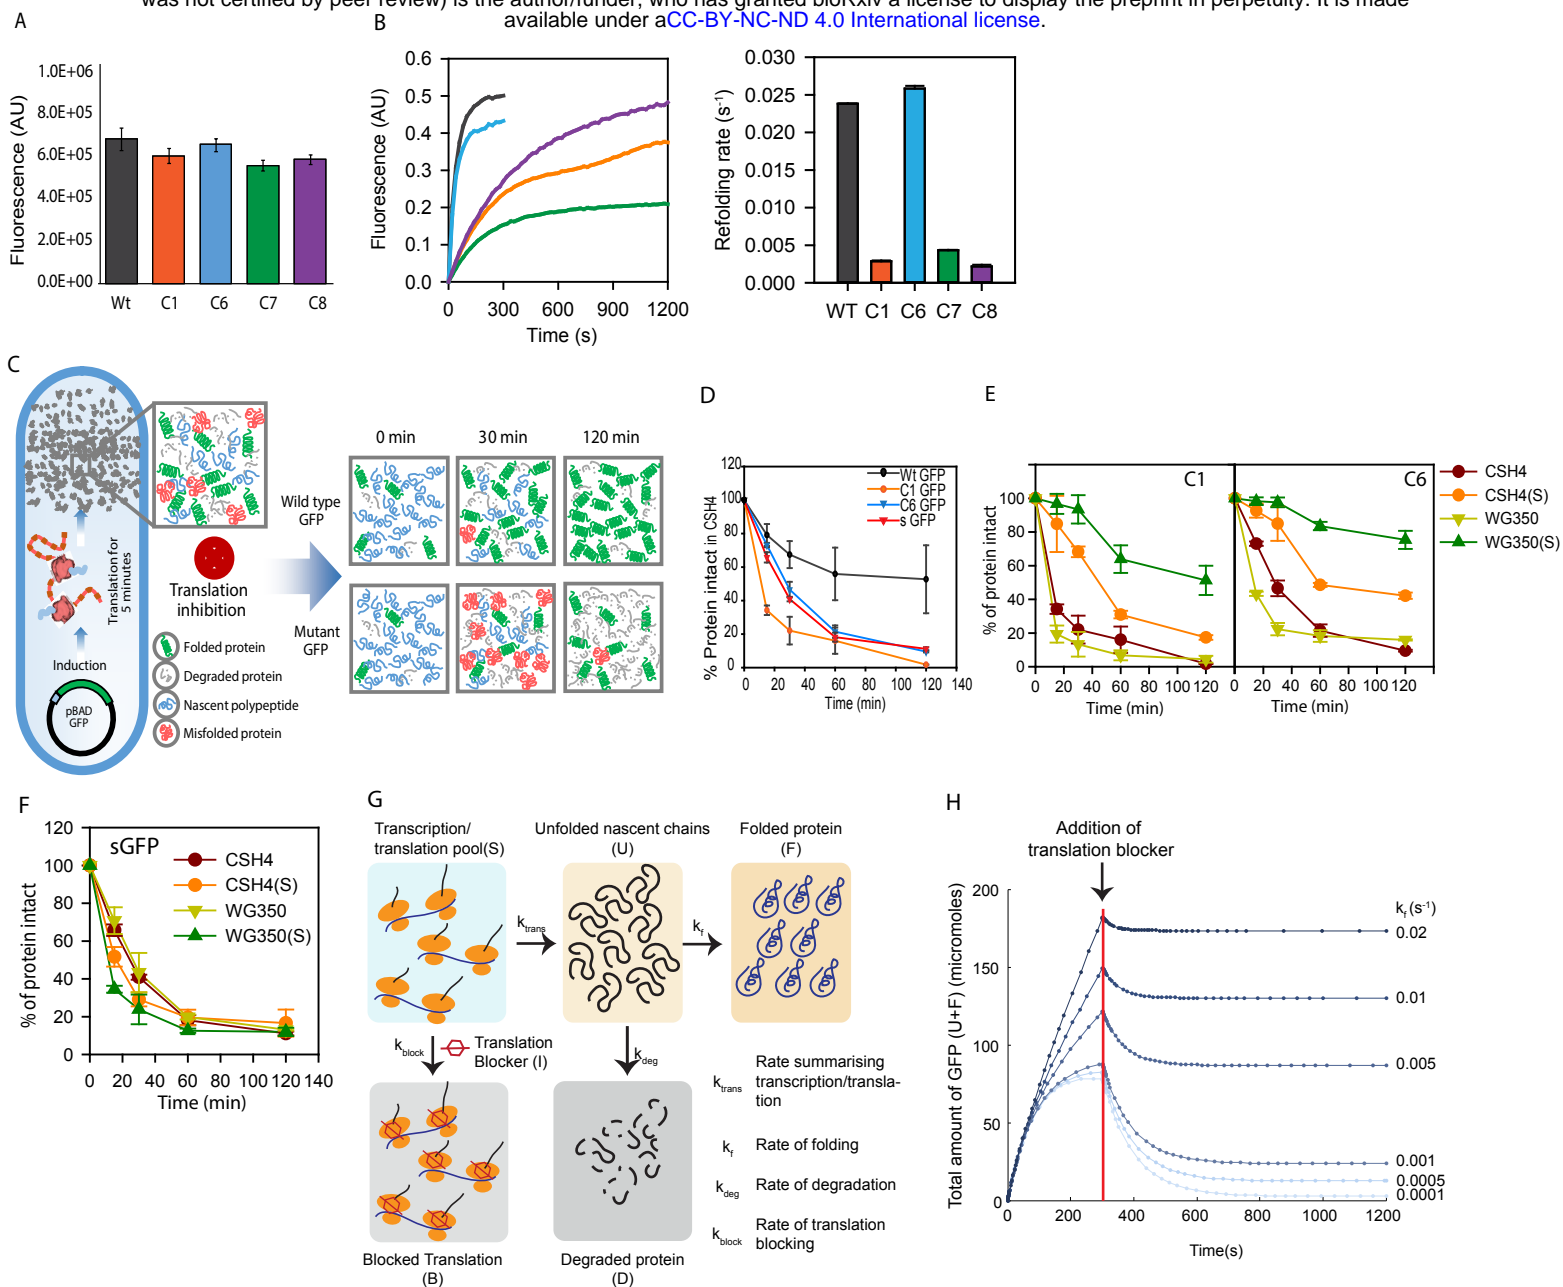

### Figure 3: Mutations buffered by altered metabolic states have compromised protein folding

**A.** Fluorescence of each of the mutants and Wt-GFP at 515nm are shown at 200nM concentration (excitation 488nm /slit-width 2nm, emission slit-width 5nm).

**B.** Refolding of GFP and the mutants were initiated by unfolding the proteins in 6M GuHCl, followed by a 100-fold dilution into Buffer-A (50mM Tris, 150mM NaCl, 2mM DTT, pH 7.4) to a final concentration of 200nm for the proteins. Refolding was followed by monitoring GFP fluorescence as a function of time.

**C.** Schematic of Chloramphenicol-based chase for degradation of GFP as described in star methods. Briefly, after a short (5min) induction of GFP with 0.5% arabinose, translation was stalled with Chloramphenicol. Cells were lysed at different points and the amount of intact GFP was monitored by immunoblotting with anti-GFP antibody.

**D.** Plot for the gel-based quantification of intact GFP in Chloramphenicol-chase assay for monitoring degradation of GFP mutants and Wt GFP in CSH4.

**E.** Plot for the gel-based quantification of intact GFP in Chloramphenicol-chase assay for monitoring degradation of mutant GFPs in WG350(S)(WG350 grown in presence of 350mM NaCl), WG350, CSH4(S) (CSH4 grown in presence of 350mM NaCl) and CSH4.

**F.** Plot for the gel-based quantification of intact GFP in Chloramphenicol-chase assay for monitoring degradation of sGFP in CSH4, WG350, CSH4(S) and WG350(S).

**G.** Schematic for simulation setting. Numerical simulation was set up with a fixed concentration of mRNA/ribosome complex (S). These complexes could either form nascent polypeptides (U) with a rate  $k_{trans}$  that is a collective rate constant for transcription/translation, or be inhibited with a rate constant  $k_{block}$  in the presence of a translation inhibitor (I). The pool of U could either degrade with a rate  $k_{deg}$  or fold with a rate constant of  $k_f$  and reach the native state (F). We finally monitor the total amount of undegraded protein (U+F) after blocking translation after 300(s) of starting the simulation (simulation start mimics induction).

**H.** Total amount of intact GFP obtained from simulation as a function of  $k_f$  while keeping  $k_{deg}$  constant at 0.01 s<sup>-1</sup>. Red line indicates the time-point at a 1 mM dose of translation-inhibitor (I) is added.

Also see Figure S3

A

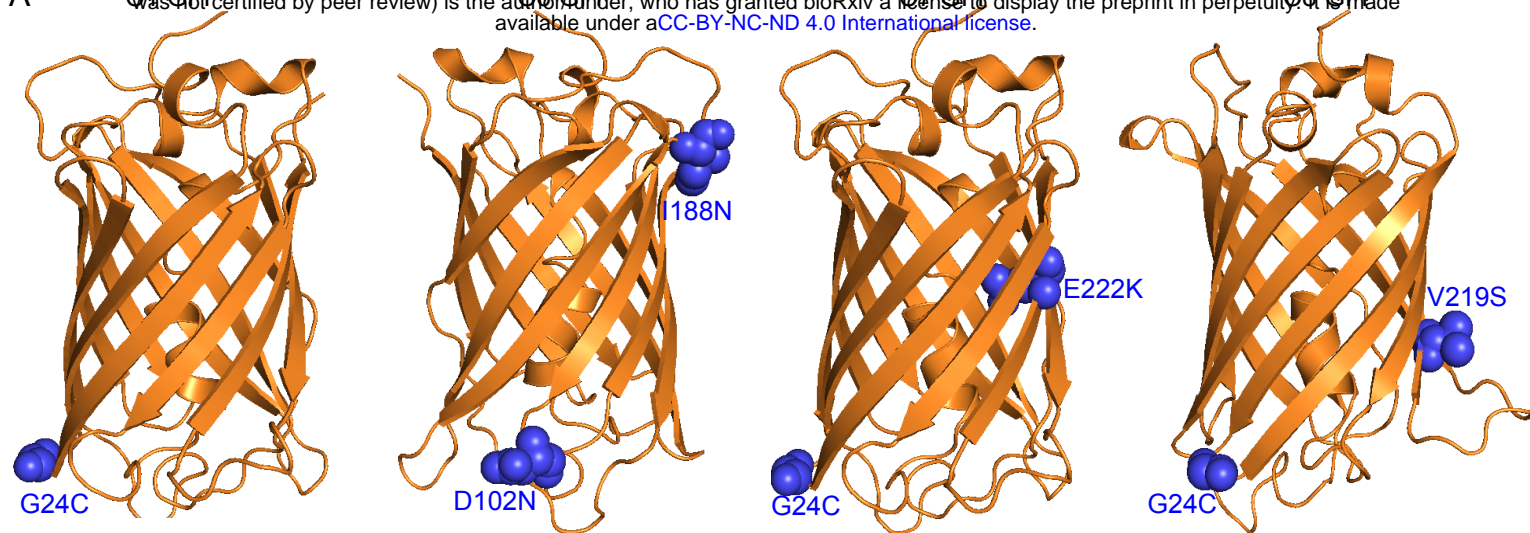

B

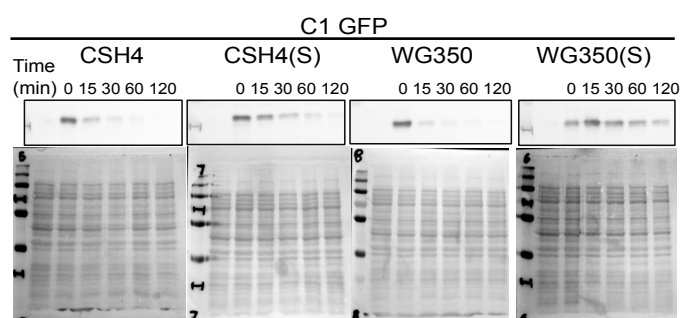

C

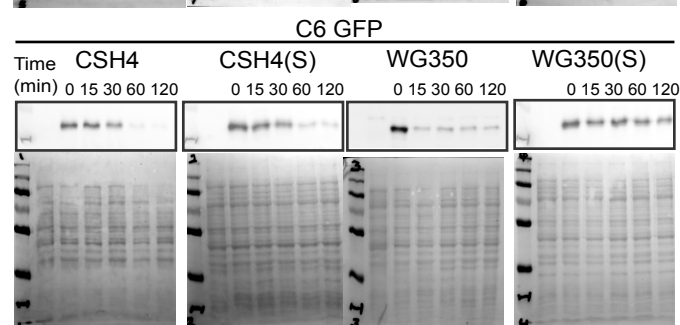

Ponceau (Loading Control)

C

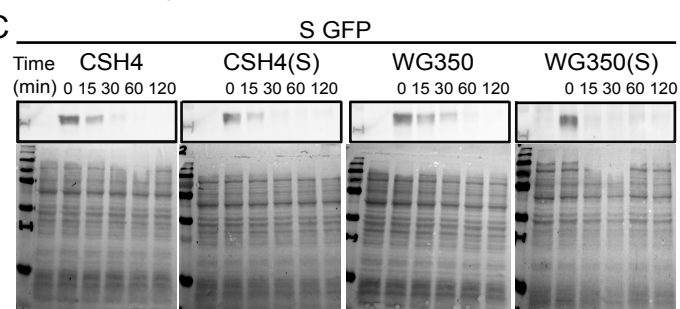

Ponceau (Loading Control)

D

ODEs:

$$d(U)/dt = -\text{ReactionFlux1} - \text{ReactionFlux2} + \text{ReactionFlux3}$$

$$d(F)/dt = \text{ReactionFlux1}$$

$$d(S)/dt = -\text{ReactionFlux3} - \text{ReactionFlux4}$$

$$d(B)/dt = \text{ReactionFlux4}$$

$$d(I)/dt = -\text{ReactionFlux4}$$

Fluxes:

$$\text{ReactionFlux1} = k_f * U$$

$$\text{ReactionFlux2} = k_d * U$$

$$\text{ReactionFlux3} = k_{\text{trans}} * S$$

$$\text{ReactionFlux4} = k_i * S * I$$

Parameter Values:

$$k_f = 0.02 \text{ (s}^{-1}\text{)}$$

$$k_{\text{deg}} = 0.01 \text{ (s}^{-1}\text{)}$$

$$k_{\text{trans}} = 0.001 \text{ (s}^{-1}\text{)}$$

$$k_i = 0.0001 \text{ (M}^{-1}\text{s}^{-1}\text{)}$$

$$\text{cell volume} = 1 \text{ (liters)}$$

Initial Conditions (micromoles):

$$U = 0$$

$$F = 0$$

$$S = 1000$$

$$B = 0$$

$$I = 0$$

Dosing:

$$\text{Delay} : 300\text{s}$$

$$1\text{mM of } I \text{ added to reaction}$$

### FIGURE S3: Fluorescence increase is not due better proteostasis in WG350(S) (Related to Figure 3)

**A.** Mutations buffered in WG350 while growing in 350mM NaCl (C1, C6, C7, C8) are marked on the GFP crystal structure (pdb: 1GFL)(Yang, Moss and Phillips, 1996).

**B.** Representative images for immunoblotting to chase degradation of C1 and C6 GFP as described in star methods in CSH4 and WG350 in presence and absence of osmotic stress. GFP degrades slowest in WG350 (S). Ponceau has been used as loading control

**C.** Representative images for immunoblotting to chase degradation of sGFP in CSH4 and WG350 in presence and absence of osmotic stress. Ponceau has been used as loading control

**D.** ODEs used for the kinetic simulations. Numerical simulation was set up with a fixed concentration of mRNA/ribosome complex (S). These complexes could either form nascent polypeptides (U) with a rate  $k_{\text{trans}}$  that is a collective rate constant for transcription/translation, or be inhibited with a rate constant  $k_{\text{block}}$  in the presence of a translation inhibitor (I). The pool of U could either degrade with a rate  $k_{\text{deg}}$  or fold with a rate constant of  $k_f$  and reach the native state (F). We finally monitor the total amount of undegraded protein (U+F) after blocking translation after 300(s) of starting the simulation (simulation start mimics induction). The reaction volume was kept at 1liter.

209 To check for *in vivo* folding defects for the isolated clones, we checked for the degradation rates  
210 of a representative set of mutants (slow folding and buffered- C1; fast folding and buffered- C6;  
211 fast-degrading and not buffered- sGFP vis a vis Wt GFP by stalling translation after briefly  
212 inducing protein expression in CSH4 (**Figure 3C**). All the mutants degraded faster than Wt GFP  
213 underlining that these mutants are folding-compromised under *in vivo* conditions (**Figure 3D**).

214 To check if difference in proteostasis between WG350 and CSH4 with and without osmotic  
215 shock contributed towards differential buffering in the stains, we checked the degradation rates  
216 for the GFP mutants. The degradation rates of the mutant GFPs in CSH4 and WG350 were  
217 similar, however there was a sharp decrease in degradation rates of the C1 and C6 in WG350(S)  
218 (WG350 when grown in 350mM NaCl) compared to CSH4(S) (CSH4 when grown in 350mM  
219 NaCl)(**Figure 3E (graph), S3B(gel)**). This was not a general decrease in degradation capacity of  
220 the cell, as sGFP - a degradation prone mutants of GFP - degraded with similar kinetics in both  
221 the stains in the presence and absence of salt-stress (**Figure 3F (graph), S3C(gel)**). Furthermore,  
222 the general proteases were upregulated in WG350(S) rather than being downregulated (shown  
223 later in **Figure 4A**) arguing against a possible decrease in degradation capacity of WG350(S).

224 A simple kinetic simulation of protein synthesis followed by folding or quality control assisted  
225 degradation (**Figure 3G, S3D**) indicated that an increase in folding rate would be expected to  
226 show a decrease in degradation (**Figure 3H**). Thus the apparent decrease degradation rate may  
227 arise solely due to differences in folding rate *in vivo* in the different strains and conditions while  
228 the degradation rate remains constant (as seen for sGFP). Taken together this indicates that the  
229 mutants isolated were indeed folding mutants and mutational buffering differed between the  
230 strains due to their differences in proteostasis capacities.

### 231 **The mutants are dependent on chemical chaperones and not on molecular chaperones**

232 To investigate the contribution of molecular chaperones, we checked if their levels changed in  
233 WG350(S). Set of genes involved in maintaining protein quality control were expected to be  
234 induced (or repressed) in WG350(S) than in WG350, CSH4(S) or CSH4. However, mRNA  
235 levels of none of the chaperones or proteases other than DnaJ and HslU/V followed the expected  
236 over-expression pattern (**Figure 4A**). Protein levels of the canonical chaperones, GroEL and  
237 DnaK also did not differ significantly (**Figure 4B**).

238 Since we isolated specific clones, it provided us with the handle to ask if these mutants were  
239 dependent on the canonical abundant chaperones of the cytosol. Single deletions of the abundant  
240 canonical molecular chaperones (tig, dnaK, dnaJ, secB, ClpB)<sup>20</sup>, or the proteases (lon, hslU/V,  
241 ClpX/P/A)<sup>39,40</sup>, did not decrease fluorescence of these clones significantly (**Figure 4C**)  
242 suggesting that intracellular folding of these mutants were independent of these proteostasis  
243 machineries. It would also mean that overexpression of DnaJ or HslU/V seen in WG350(S) at  
244 mRNA levels may not contribute to mutational buffering of the mutants. Coherently,  
245 overexpressing DnaK/DnaJ/GrpE or the GroEL/GroES system in CSH4 or WG350 did not  
246 increase the fluorescence of these mutants (**Figure 4D, S4A, S4B**), suggesting that the buffering  
247 effect in WG350(S) is independent of the concentration of these molecular chaperones. To  
248 mimic a global increase chaperone levels we used other environment stressors like heat shock  
249 and oxidative stress that are known to increase stress-response driven chaperone levels<sup>20,41,42</sup>.  
250 The fluorescence of the isolated clones that show enhanced folding in the presence of NaCl  
251 induced osmotic stress did not fluoresce better with heat or oxidative stress (**Figure 4E**).

252 *In vitro*, GroEL/ES machinery could only marginally accelerate the rate of refolding of GFP  
253 mutants C1 and C8, whereas in the presence of DnaK/J/GrpE, mutant C8 showed no difference  
254 in the refolding rate and mutant C1 showed a slight reduction in the rate of refolding (**Figure**  
255 **4F**). This confirms that these mutants are not the substrates of the abundant chaperone  
256 machineries *in vivo* and *in vitro*. To investigate if molecular chaperones could assist the folding  
257 of these mutant GFPs in WG350(S) more efficiently, we studied the physical interaction of these  
258 polypeptides chains with molecular chaperones in WG350(S). To check this we performed *in*  
259 *vivo* crosslinking and measured the amount of higher-order complexes (possibly with  
260 components of proteostasis machinery) formed by the mutants GFPs in CSH4 and WG350 with  
261 and without osmotic shock (**Figure 4G, S4C**). The levels were not higher in WG350(S),  
262 indicating that chaperone association is not altered in WG350(S). Thus, strain-specific  
263 proteostasis differences that alter mutational buffering have contributions from components other  
264 than molecular chaperones.

265 Mutant-specificity and protein-specificity of folding assistance *in vivo* has been shown to be a  
266 hall-mark of chemical chaperone mediated folding. To confirm if these mutants were indeed  
267 dependent upon chemical chaperones for folding, we obtained their refolding rates in the



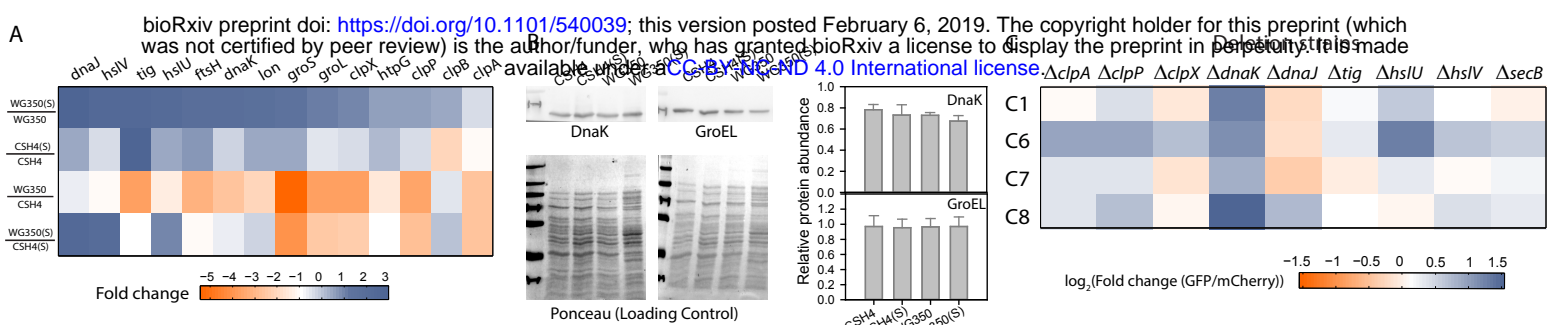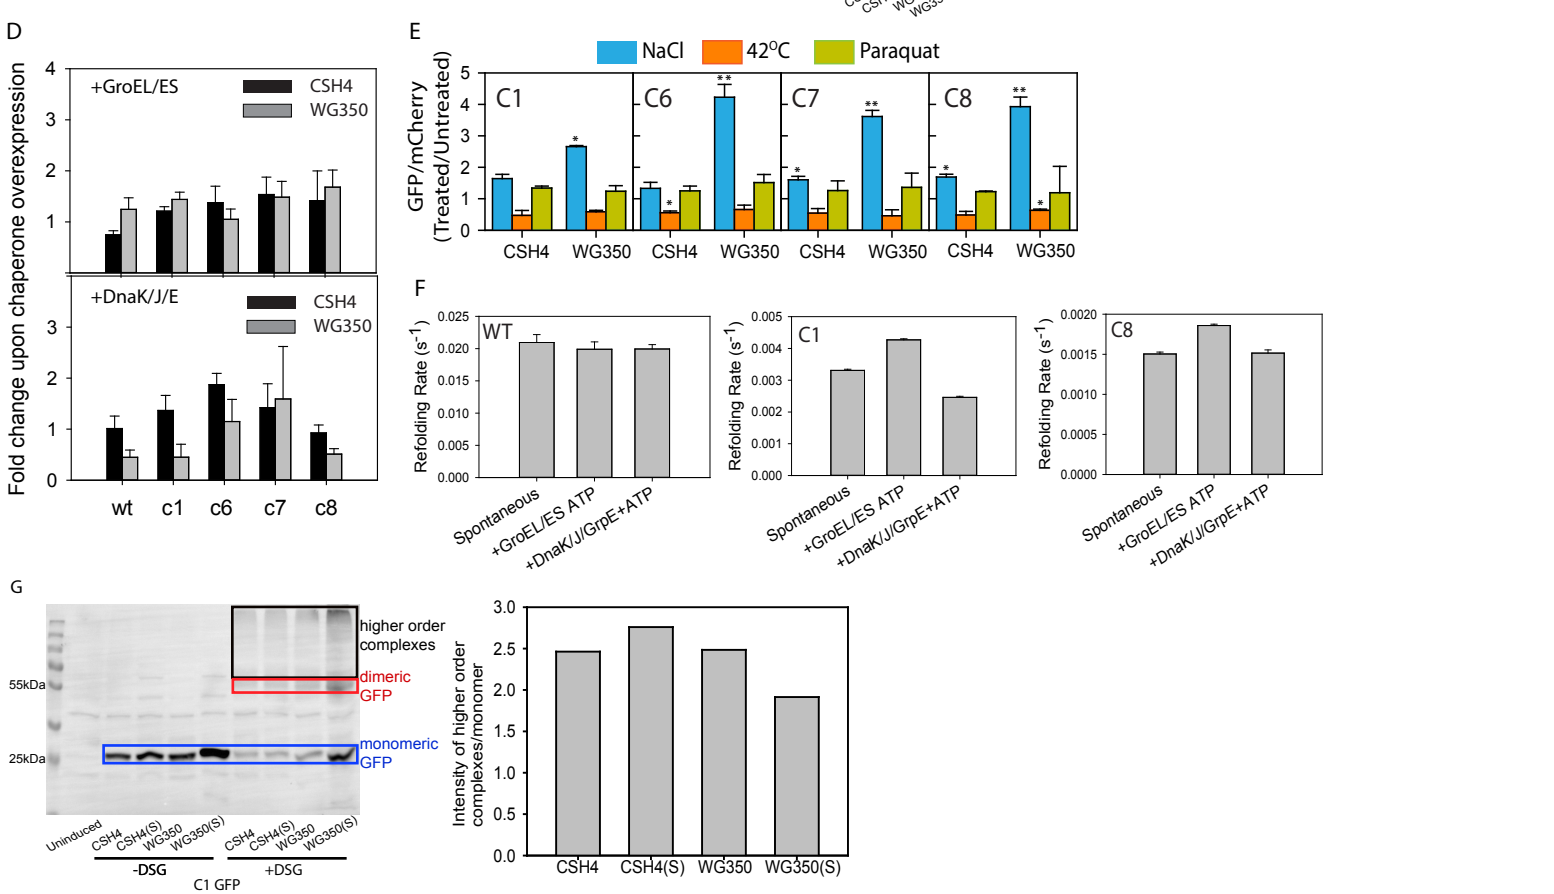

## Figure 4: Folding of isolated mutants is independent of molecular chaperones

**A.** Heatmap representing relative quantification of transcripts encoding proteostasis related proteins in WG350 and CSH4 in the presence and absence of 350mM NaCl.

**B.** Right panel shows the immunoblot and left panel the image based quantitation of GroEL and DnaK expression levels in WG350 and CSH4 in the presence and absence of 350mM NaCl (p-value>0.05). Ponceu stained blot, used as loading control, is shown at the bottom of right panel.

**C.** Wt GFP and the mutants were expressed in WT *E. coli* (BW25113, BW) and in strains harboring single deletion of different molecular chaperones and proteases. GFP/mCherry for each of the mutants were normalized with respect to Wt GFP fluorescence in the same strains. Fold change in GFP/mCherry for each of the mutant GFPs between BW and the deletions strains was calculated using these normalized values.  $\log_2$  values of this fold change is shown as heatmap.

**D.** Wt GFP and the mutants were expressed in WG350 or CSH4 with or without plasmids overexpressing either DnaK/J/E or GroEL/ES. Median GFP/mCherry fluorescence levels of Wt GFP and the mutants in the different strains are shown as a bargraph. Error bars represent standard deviation of 3 biological replicates (p-value>0.05).

**E.** Wt GFP and representative mutants were expressed in CSH4 and WH350 in the absence or presence of external stressors (42°C - heat shock, 80μM Paraquat- oxidative stress, 350mM NaCl - osmotic shock). GFP/mCherry fluorescence of Wt GFP and mutants and shown in each of these conditions as bargraph with standard deviations as error bars from 3 biological replicates. Significance is calculated using student's t test.

**F.** *In vitro* refolding Wt GFP and mutants were initiated as described earlier. To check chaperone dependence, unfolded proteins were diluted 100-fold in the presence of DnaK/DnaJ/GrpE (400nM/800nM/400nM, respectively) or GroEL/ES (400nM/800nM, respectively), and folding was initiated by adding 2mM ATP. Refolding was followed by monitoring GFP fluorescence as a function of time. Rate of refolding is plotted for Wt GFP and mutants of GFP in presence and absence of chaperoning machinery.

**G.** Immunoblotting for GFP showing the recruitment of nascently formed Wt GFP and mutant GFP into multiprotein complexes. After a brief induction of GFP (and mutant) expression, cells were treated with a cell-permeable crosslinker (DSG). Subsequent to crosslinking, cells were lysed and resolved on SDS-PAGE followed by immunoblotting with anti-GFP antibody. Free GFP (or mutants) are show with the blue box, dimeric GFP (or mutants) are shown in red box and multimeric complexes are shown in black box. The ratio of GFP in multimeric complex and the amount in monomeric state is shown in the accompanying bar graph.

Also see Figure S4

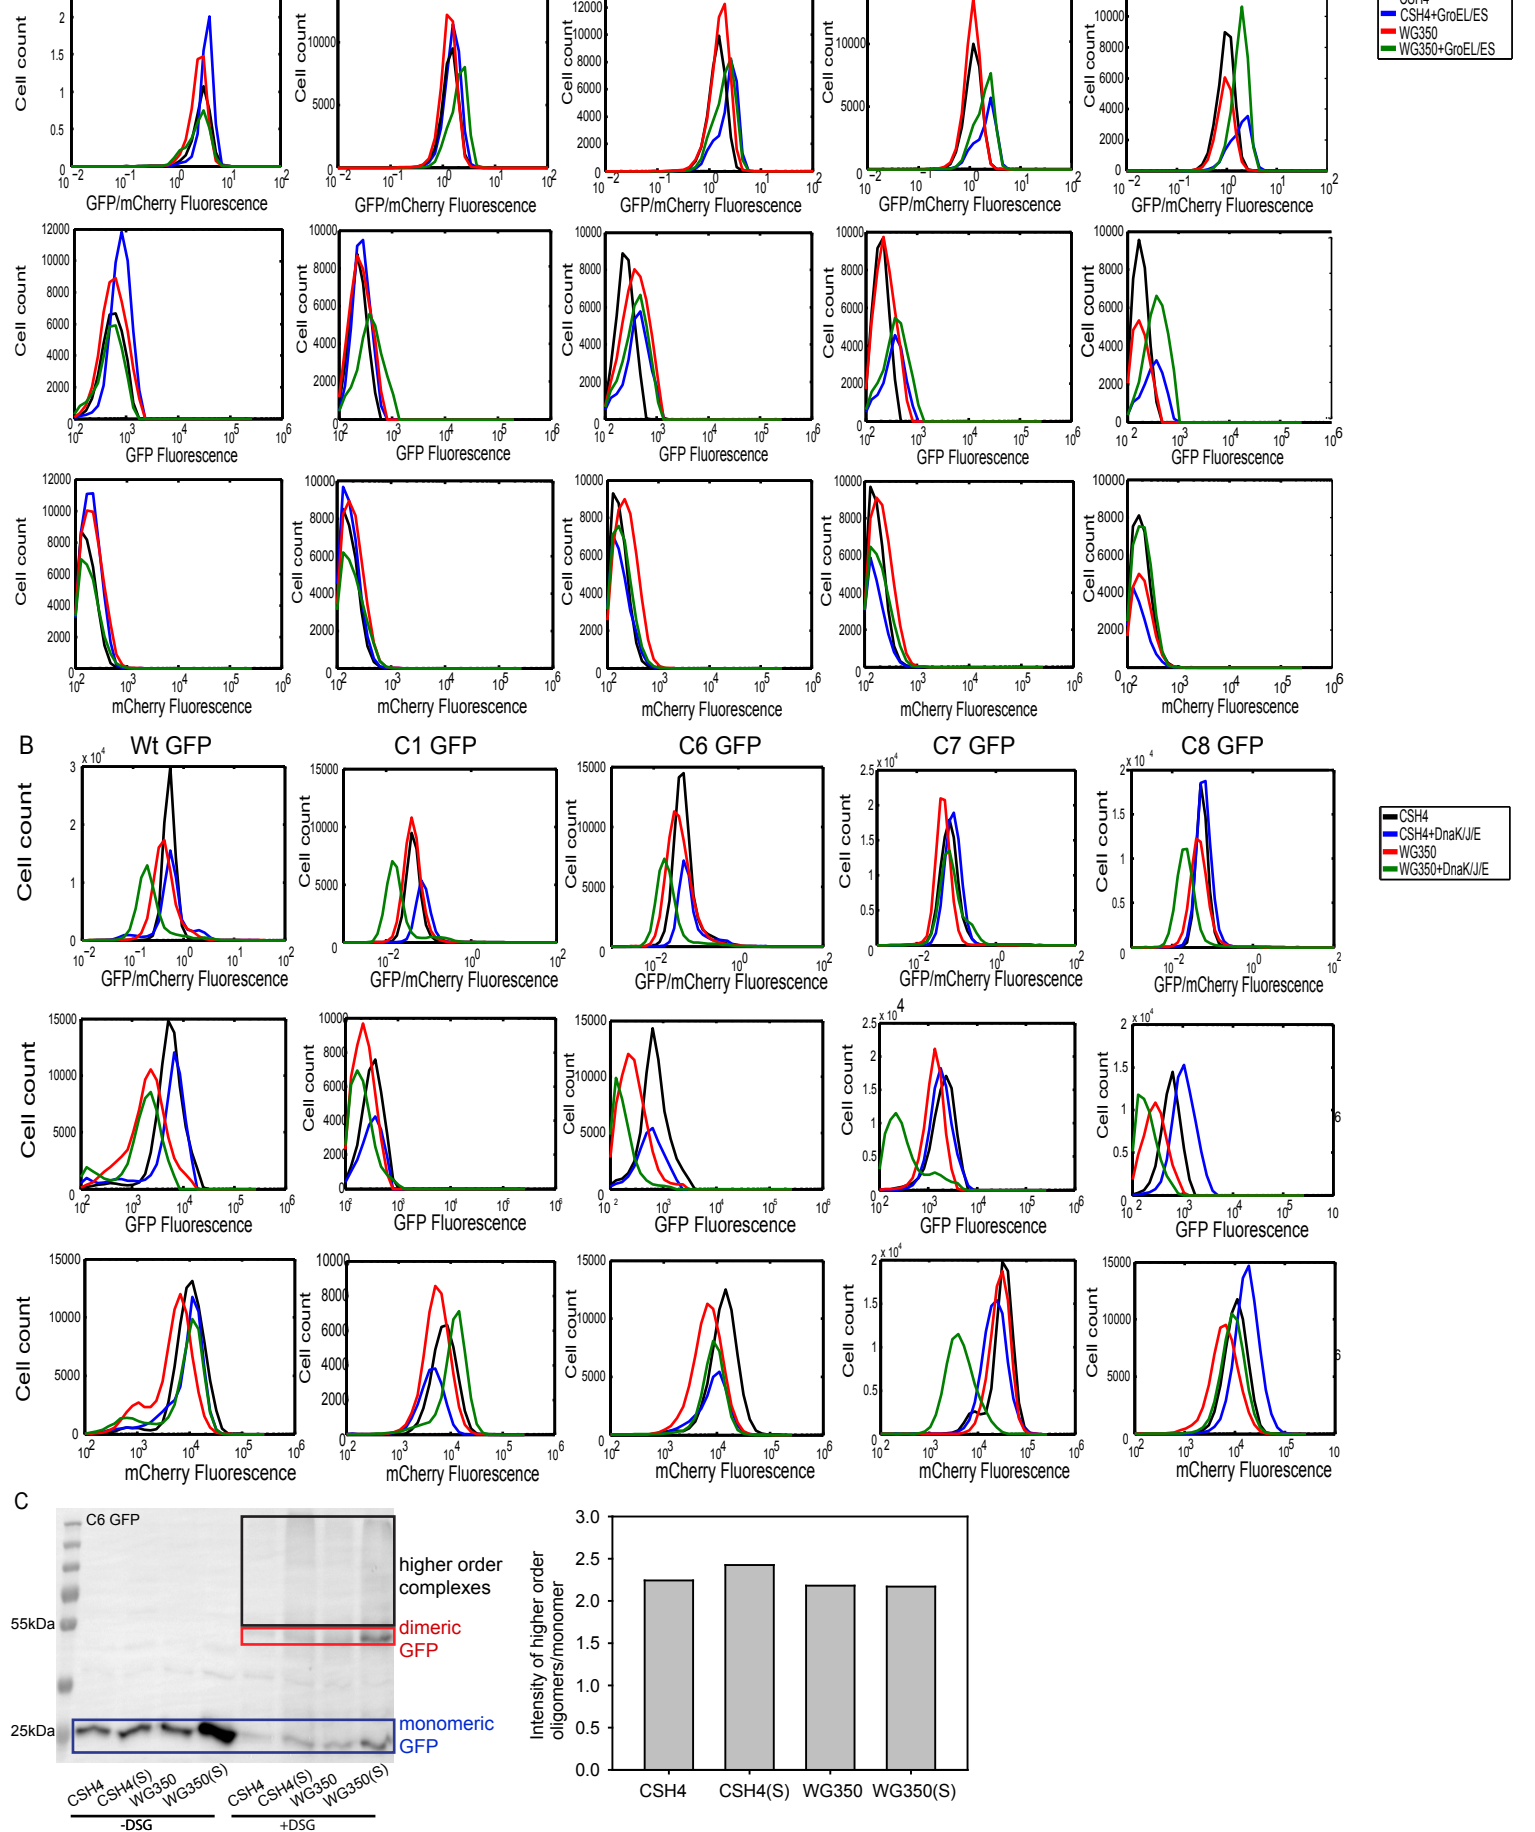

**FIGURE S4: Observed buffering of GFP mutants is not channeled only through molecular chaperones (Related to Figure 4)**

**A.** Histogram for GFP/mCherry Fluorescence (top panel), GFP (middle panel) and mCherry fluorescence (bottom panel) in absence of overexpressed GroEL/ES (black, red, 2 biological replicates) and while co-expressed with GroEL/ES (blue, green, 2 biological replicates) in CSH4 and WG350. Induction protocol was followed as described in Star Methods.

**B.** Histogram for GFP/mCherry Fluorescence (top panel), GFP (middle panel) and mCherry fluorescence (bottom panel) in absence of overexpressed DnaK/J/GrpE (black, red, 2 biological replicates) and while co-expressed with DnaK/J/GrpE (blue, green, 2 biological replicates) in CSH4 and WG350.

**C.** Immunoblotting for GFP showing the recruitment of nascently formed C6 GFP into multiprotein complexes. Free GFP (or mutants) are shown with the blue box, dimeric GFP (or mutants) are shown in red box and the multimeric complexes are shown in black box. The ratio of GFP in multimeric complex and the amount in monomeric state is shown in the accompanying bar graph.

268 presence of different metabolites (**Figure 5A**). Many of the metabolites could act as chemical  
269 chaperones to accelerate the refolding rates. Molecules like Aspartate, Glycine, chaperoned  
270 refolding of two of the mutants (albeit with mutation specific effect); C6 mutant did not show  
271 enhanced refolding rate with any of the small molecules tested. This reiterated the mutant  
272 specific effect of different chemical chaperones<sup>26,27</sup> and suggested that these small molecules  
273 could indeed facilitate the folding of these proteins and lead to mutational buffering. Of note, the  
274 space sampled in terms of cellular small-molecules was non-exhaustive and no combinations  
275 were tried.

276 To check if small molecule milieu of cells can aid folding we re-constituted *in vitro* refolding of  
277 the selected GFP mutants in small-molecule enriched cellular extract of WG350. Refolding of  
278 GuHCl unfolded GFP mutants were initiated by diluting out the denaturant in the presence of  
279 extract obtained from WG350 (**Figure 5B**). Interestingly, these mutants were refolded to only a  
280 negligible extent in the absence of extract while folding substantially in its presence, underlining  
281 the importance of the small molecule milieu of the cell in chaperoning protein folding. We  
282 confirmed that these lysates were free from proteins and hence molecular chaperones that are  
283 known to assist refolding. It is important to stress that the current technologies of extraction  
284 limits the concentration at which these small molecules can be extracted; they are more than a  
285 thousand fold diluted from their physiological concentrations. It is therefore difficult to  
286 recapitulate the full potential of this mixture, and reproduce the *in vivo* differences between  
287 strains. However, it demonstrates that the metabolite pool, even on dilution, acts as chaperone  
288 and hence can participate in cellular proteostasis. Hence, metabolic differences have the capacity  
289 to show altered mutational buffering in different metabolic states. This is primarily evident for  
290 mutations that destabilize proteins and make them sensitive to osmolyte concentrations.

291 Taken together, metabolic differences manifest differences in mutational buffering which may  
292 have a significant contribution from metabolite-dependent proteostasis.

### 293 **Altering cellular metabolism using metabolites changes mutational buffering**

294 Having realized that genetic and osmotic alteration of metabolism changes the spectrum of  
295 mutation buffering, we asked if other routes of altering metabolism may show similar changes in  
296 buffering. Addition of excess metabolites - like amino acids- is known to rewire metabolism<sup>43</sup>.

A

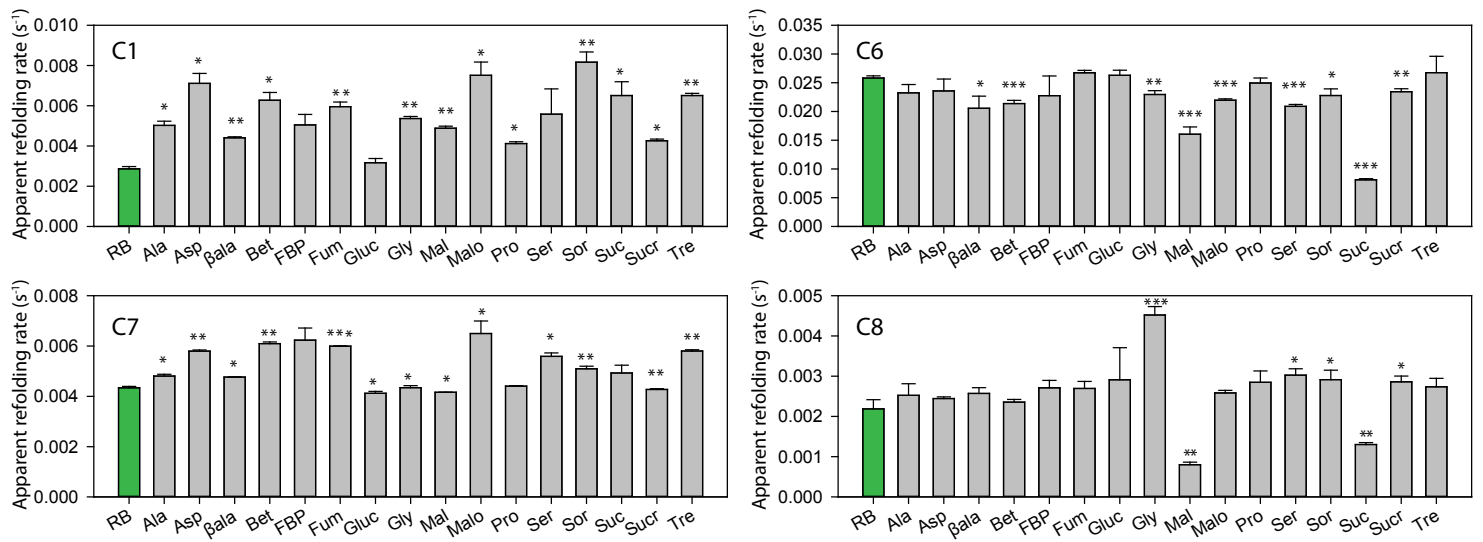

## B Refolding in cellular metabolite extracts

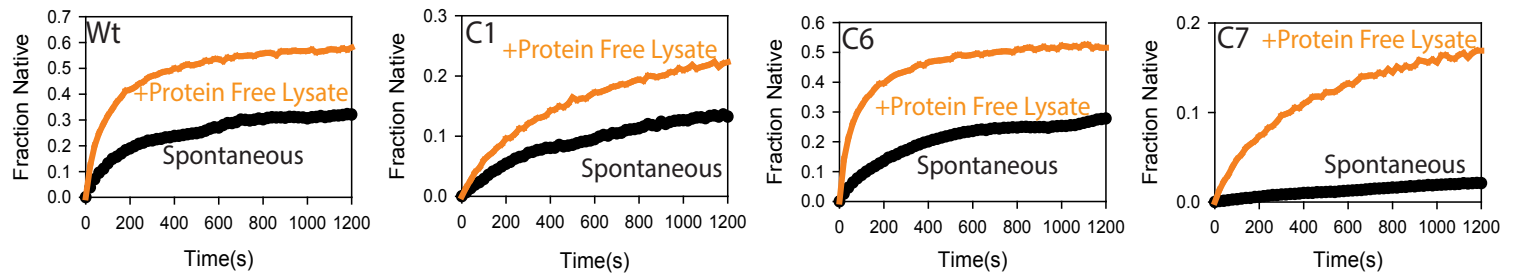

**Figure 5: Metabolites can chaperone the mutants in vivo and in vitro.**

**A.** Refolding of Wt GFP or mutant GFP was initiated as described earlier in the presence of 100mM concentration of different metabolites. Refolding rates were obtained by fitting the refolding traces with single exponential equations. Mean of refolding rates, along with standard deviations are shown for three replicates of refolding reactions. RB (shown in green bars) are refolding rates in Buffer-A, the base buffer in which the metabolites are added. P-value is calculated using students's t test with respect to RB. Ala:Alanine, Asp:Aspartate, βala: β alanine, Bet: Betaine, FBP: Fructose 1,6-bis-phosphate, Fum: Fumarate, Gluc: Glucose, Gly: Glycine, Mal: Malate, Malo:Malonate, Pro: Proline, Ser: Serine, Sor: Sorbitol, Suc: Succinate, Sucr: Sucrose, Tre: Trehalose.

**B.** Protein free extracts were isolated from WT *E. coli* (BW25113, BW) as described in Methods. Refolding was performed by diluting unfolded proteins (Wt GFP or mutants) 100-fold into these extracts.

297 We added excess of the amino acids, or sugars and other metabolites to rich media to alter  
298 metabolism and check for altered buffering. Exogenous addition of many of these compounds to  
299 growth media (individual concentrations provided in **Table S2**) also led to enhanced folding of  
300 some of mutants GFP in CSH4 *in vivo* (**Figure 6A**). Specifically, addition of Alanine increased  
301 the fluorescence of all the mutant proteins as seen *in vitro* (**Figure 6B**). Further demonstrating  
302 that the mutants isolated from the screen predominantly respond to proteostasis alterations due to  
303 differences in metabolites, and mutational buffering can be altered by altering cellular  
304 concentration of metabolites. Interestingly, different additives had mutant-specific chaperoning  
305 activity *in vivo* as seen *in vitro*. This unravels the complex connection between mutational  
306 buffering and metabolic status.

307 Metabolism is dependent on genetic background<sup>43-45</sup>. BW strain, a WT K-12 strain with a  
308 different genetic background, shows completely different pattern of mutational buffering for the  
309 mutant GFPs in the presence of the different metabolites (**Figure 6C**). The inactive pool of  
310 mutants also showed buffering in general in the presence of different metabolites. Remarkably,  
311 the metabolites had opposite effects on some of the GFP mutants in the two strains - BW and  
312 CSH4. For example, while addition of Malonate decreased fluorescence of C6 in CSH4, it  
313 increased the same mutant's fluorescence in BW (**Figure 6B, 6D**). Similar strain specific  
314 differences were obtained in different mutants of GFP in the presence of Betaine or Proline  
315 (**Figure 6B, 6D**). This is expected if the cellular metabolite pool participates in proteostasis and  
316 changes differently in presence of an excess metabolite depending upon the genetic background.  
317 Thus, alteration in metabolic states alters mutational buffering for the folding compromised  
318 mutants.

319 Taken together with our previous observation that these mutants are primarily dependent upon  
320 chemical chaperones for folding, we posit a prominent role of metabolism and metabolites in  
321 regulating differences in proteostasis capacity.

322

### 323 **Osmotic compositions are able to determine the spectrum of mutational buffering**

324 Is the link between metabolism and mutational buffering relevant in context of natural evolution?

325 To answer, we checked if adaptation of an organism in a different niche (that changes

A

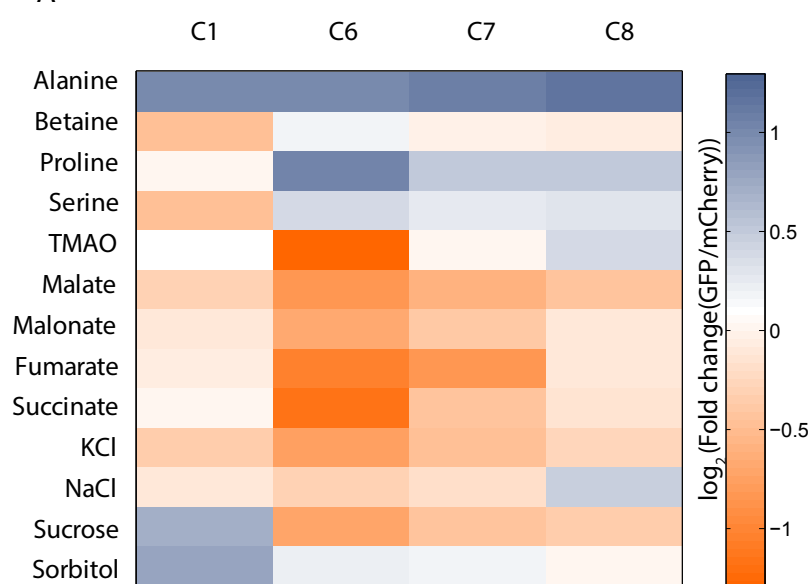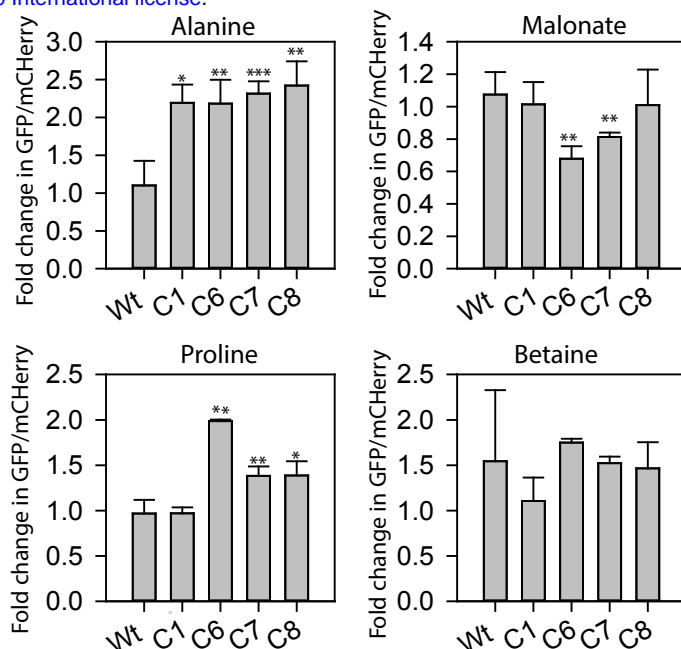

C

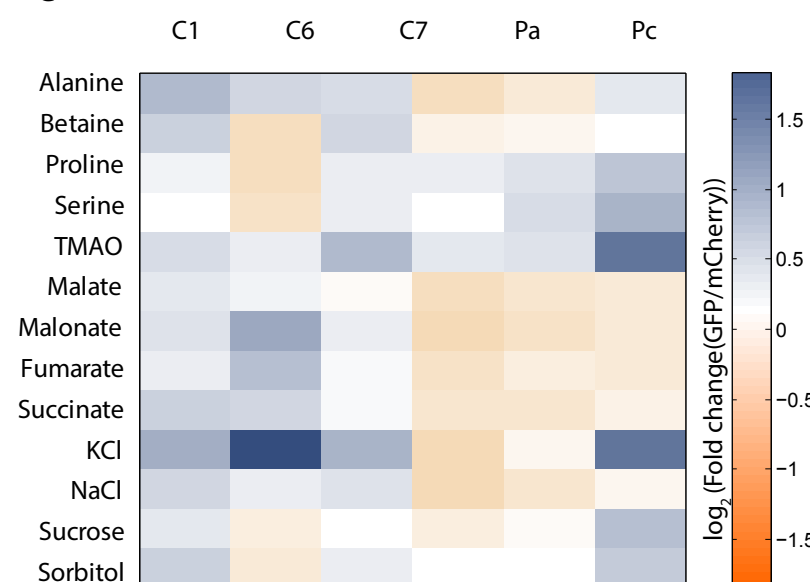

D

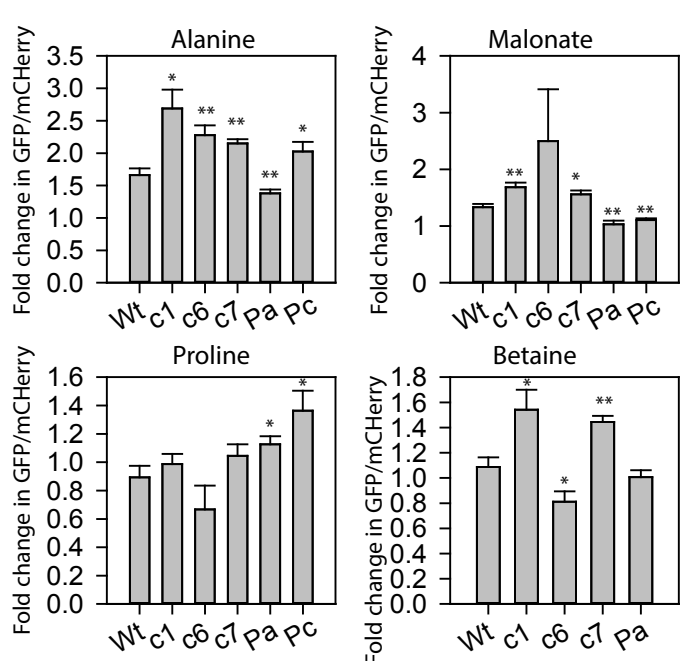

**Figure 6: Altering cellular metabolism by exogenous supplementation of metabolites modifies mutational buffering capacity**

**A.** Expression of Wt GFP and mutants were induced in CSH4 cells either growing in LB or in LB containing different metabolites. Median of GFP/mCherry fluorescence as measured by single-cell fluorescence is shown as heat map

**B.** Fold change in median of GFP/mCherry fluorescence in few metabolites (Alanine, Proline, Malonate, Betaine) is shown as bar graph along with standard deviations from three biological replicates and P-value calculated with respect to Wt by students's t-test.

**C.** Expression of Wt GFP and mutants were induced in BW cells either growing in LB or in LB containing different metabolites. Median of GFP/mCherry fluorescence as measured by single-cell fluorescence is shown as heat map

**D.** Fold change in median of GFP/mCherry fluorescence in BW when grown in LB added with Alanine, Proline, Malonate and Betaine is shown as bar graph along with standard deviations from three biological replicates and P-value calculated with respect to Wt by students's t-test.

326 metabolism) is associated with the evolution of an altered buffering capacity; we chose to evolve  
327 WT *E. coli* (BW25113) to adapt to high salt stress (**Figure 7A**). The strain was continuously  
328 passaged in LB in the presence of 500mM of NaCl. We kept the evolution duration short in order  
329 to ensure that drift mutations are minimal. Multiple strains were generated by parallel laboratory  
330 adaptive evolution, and we obtained strains that were fitter in the presence of osmotic stress by  
331 approximately 500 generations (**Figure 7B**). We argued that adaptation for growth in chronic  
332 hyperosmotic stress would have fixed mutations that perturb the osmotic composition and hence  
333 rewired the metabolic status of the cell. We confirmed that these strains indeed have difference  
334 in metabolite pool even when grown in the absence of osmotic shock (**Figure 7C**) we could now  
335 ask if these metabolic differences changed the mutational buffering capacity. Remarkably, the  
336 strains tested showed buffering specifically for the C1 and C7 mutants of GFP that were buffered  
337 in WG350 during osmotic stress (**Figure 7D**). The activities of the mutants were two to four fold  
338 higher in the different evolved strains in mutant-specific manner though the folding of Wt GFP  
339 was not altered in these strains (**Figure S5A, S5B**). However, *E. coli* molecular chaperones DnaK  
340 and GroEL were not upregulated in the evolved strains compared to the unevolved BW strain as  
341 checked by immunoblotting (**Figure 7E**) indicating that canonical hubs of proteostasis were not  
342 altered in these evolved strains. We confirmed by chase assay that degradation of the buffered  
343 mutants was indeed slower in strains that show buffering than in the unevolved strain (**Figure**  
344 **7F, S5C**). We confirmed that slower degradation of these mutants in the evolved strain was  
345 independent of the activity of the degradation machinery as another degradation prone mutant of  
346 GFP (sGFP) degraded as rapidly in the evolved strain as in the unevolved strain (**Figure S5D**);  
347 impaired degradation hence is a fallout of faster folding of the buffered GFP mutants in the  
348 evolved strains. This indicated that a completely different strain evolved to have altered osmotic  
349 composition is able to buffer similar mutational variation as seen in the WG350 strain during  
350 osmotic shock. Response to osmotic shock, or a similar metabolic state once fixed in the genome  
351 in the absence of osmotic shock, is able to buffer similar mutational variations. Similar to GFP  
352 mutants, mutants of GmR also exhibited higher activity in most of evolved strains than the  
353 unevolved strain (**Figure 7G, H**). Importantly, each of the mutants had different activities in the  
354 different osmotolerant strains. Taken together the metabolic state of a cell is directly linked to  
355 their ability to buffer mutational variations. Adaptation to a niche with different osmolarity  
356 changes the spectrum of mutations buffered. This in turn could change the route of molecular

A

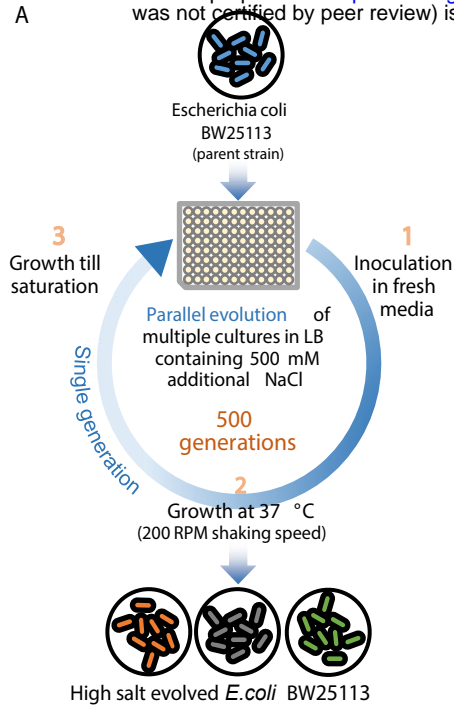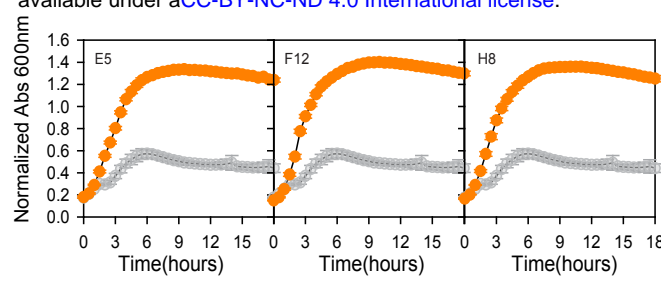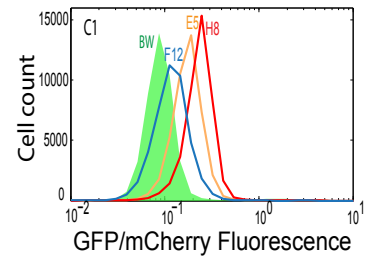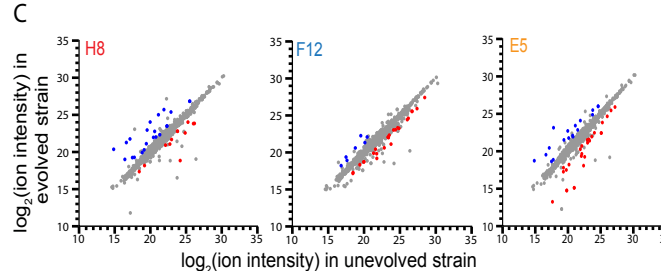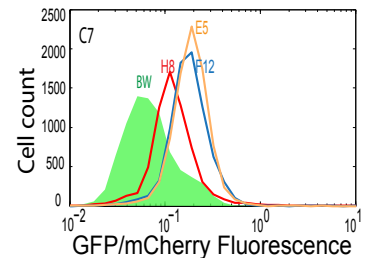

E

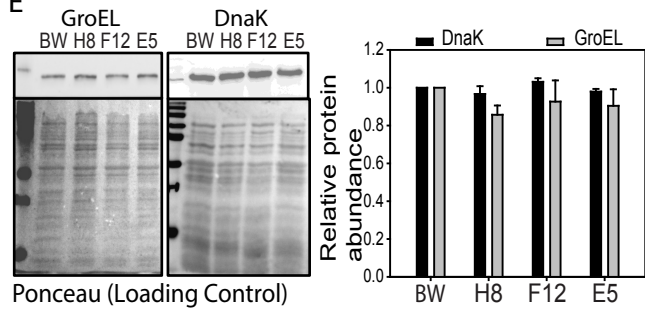

F

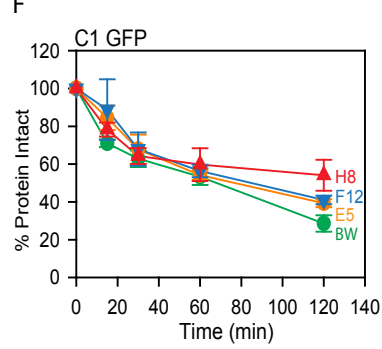

G

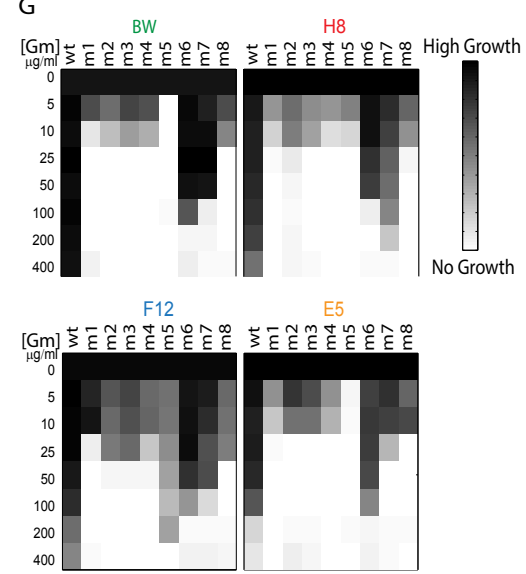

H

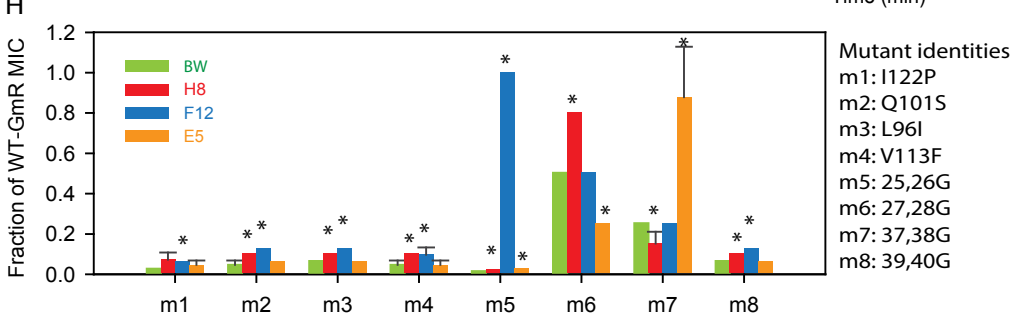

**Figure 7: Wild-type cells evolve altered buffering capacity with evolution of a different metabolome**

**A.** Schematic of strategy for Laboratory Adaptive Evolution of osmotolerant strains of *E. coli* starting from BW (WT *E. coli* K-12, BW25113).

**B.** Growth curve of evolved BW (WT *E. coli* K-12, BW25113) and osmotolerant strains E5, F12, H8 in 500mM of NaCl added in excess to LB medium while growing at 37°C, 200rpm.

**C.** Comparison of metabolite features of representative evolved strains (E5, F12 and H8) and its comparison with BW. The colored circled represent metabolites that are significantly altered in the evolved strains.

**D.** Histogram for GFP/mCherry fluorescence of GFP mutants C1 and C7 in the BW and evolved strains (E5, F12 and H8).

**E.** Comparative quantification of chaperone proteins DnaK and GroEL in BW and evolved strains (E5, F12 and H8) were done by immunoblotting with specific antibodies as described earlier. Quantification of the chaperone levels are shown as bar graphs. Error bars represent standard deviation of three replicate measurements ( $p$ -value>0.05).

**F.** Chloramphenicol based chase for checking protein degradation rates were performed in BW and evolved strains (E5, F12 and H8) as discussed earlier. The levels of C1 GFP at different time points are shown as a function of time in different strains.

**G.** Heatmap for growth based activity of Gm-R mutants and Wt Gm-R in unevolved strain (BW) and evolved strains (E5, F12 and H8) in increasing concentrations of gentamicin.

**H.** Bar graph representing percentage MIC of a selected set of Gm-R mutants w.r.t Wt Gm-R in the respective strains. Error bars represent standard deviation from 2 biological replicates.

Also see Figure S5.



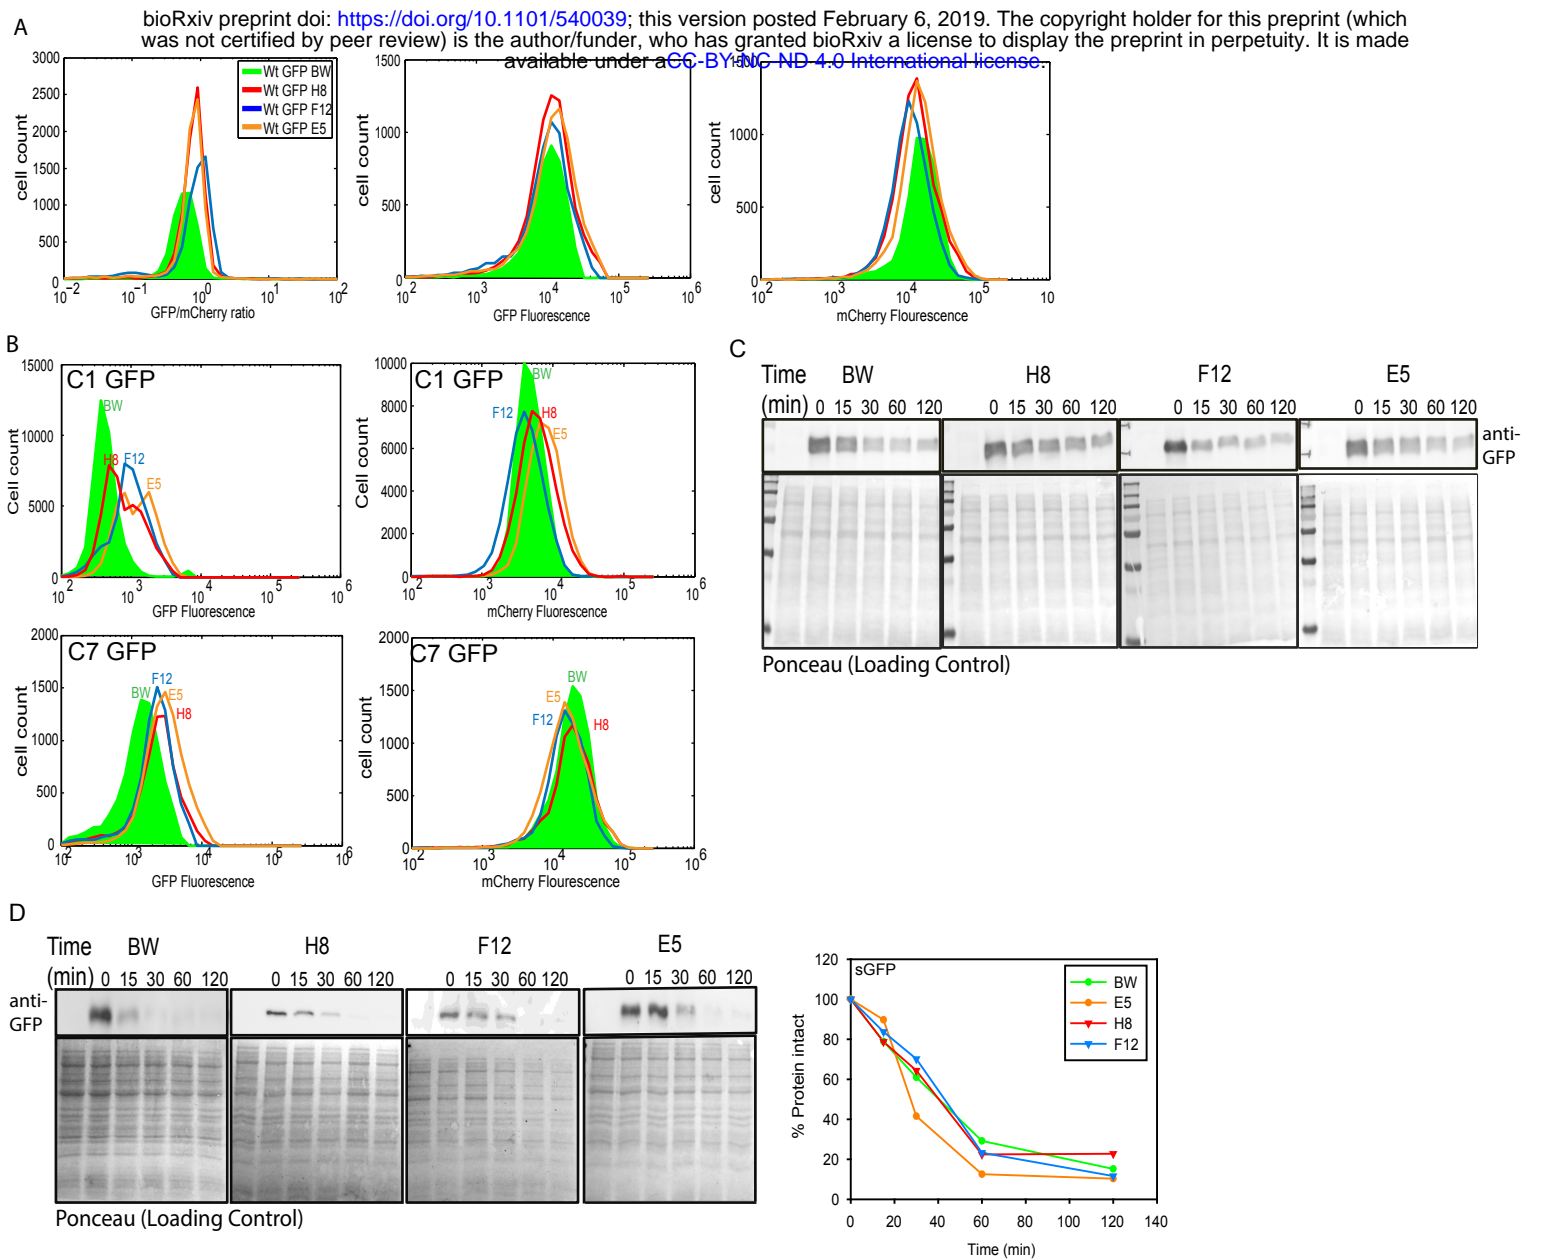

**FIGURE S5: Modification in metabolome due to evolution changes the mutation buffering capacity of the cell (Related to Figure 7)**  
**A.** Histogram for Wt GFP fluorescence represented as ratio of GFP/mCherry fluorescence (left panel), GFP (middle panel) and mCherry fluorescence (right panel) in unevolved BW (WT E.coli K 12, BW25113) and evolved osmotolerant strains E5, F12, H8.  
**B.** Histogram for fluorescence of GFP mutants C1 and C7 in GFP channel (left panels) and mCherry channel (right panels) in unevolved BW (WT E.coli K 12, BW25113) and evolved osmotolerant strains E5, F12, H8.  
**C.** Representative images of Chloramphenicol based chase for checking degradation rates of C1 GFP in BW (WT E.coli K 12, BW25113) and evolved strains E5, F12, H8. GFP is degraded slower in evolved strains than BW  
**D.** Representative images of Chloramphenicol based chase for sGFP in BW (WT E.coli K 12, BW25113) and evolved strains E5, F12, H8. sGFP is degraded with similar rates in evolved and unevolved BW

357 evolution of proteins, linking metabolism to evolution of protein sequences through alterations in  
358 proteostasis.

### 359 **Implications**

360 In this work we have indicated the capability of *E. coli*, a prokaryotic unicellular organism, in  
361 affecting mutational buffering through accumulation of small molecules in the cell. This, to the  
362 best of our knowledge, is a maiden report that specifically describes the chaperoning activity of  
363 the small molecule component of the cytosol of *E. coli*. While this fact is important, its  
364 regulation through osmotic shock or genetic alterations makes it even more interesting in the  
365 context of regulation of protein folding. Regulation of protein folding capacity enables condition  
366 specific canalization or decanalization of mutants<sup>46-48</sup>. This we believe would be important when  
367 organisms shift niches and evolve new functionalities. It is tempting to speculate that conditions  
368 that have been reported to lead to altered Hsp90 levels during the evolution of *A. mexicanus* cave  
369 dwelling variants, may also have led to alteration in intracellular osmolyte composition<sup>51</sup>. While  
370 *E. coli* is a primitive model organism to comment on adaptive strategies and genetic buffering in  
371 higher eukaryotes with complex developmental pathways, it surely paves way for more  
372 interesting investigations to establish the potential link between osmotic composition, and their  
373 alterations with canalization.

374 The work may also have important implications in explaining differences in the tissue-specificity  
375 and late-onset nature in different aggregation associated diseases<sup>52-55</sup>. It is already well-known  
376 that dietary restrictions or molecules like metformin that alters metabolism, assist  
377 proteostasis<sup>56,57</sup>. While a large body of work has ascribed these beneficial effects on different  
378 canonical proteostasis pathways like autophagy and ERAD<sup>58-61</sup>, it is possible that altered cellular  
379 milieu may contribute towards alleviating age-dependent proteostasis collapse<sup>57</sup>. Further  
380 investigations would be required to test this relation.

381 Alteration of metabolic states, as shown in this work provides a new avenue for alteration of  
382 proteostasis. Use of a simple model organism serves as an *in vivo* test tube to propose and test  
383 the hypotheses related to cellular milieu. In our case we tested that composition of cellular milieu  
384 alters with metabolism, and has the potential to alter protein folding and proteostasis network.  
385 This may link metabolism to misfolding diseases and provide alternate routes to manipulate cells

386 to fold proteins more efficiently, in a case by case basis. We emphasize the importance of the  
387 "case-by-case" part of the statement, as it is seen that while one metabolic state may allow better  
388 folding of some mutants of a particular protein, it is not guaranteed to help other mutants of the  
389 same protein or mutants of some other protein. It therefore needs to be considered carefully  
390 whether there is anything like a better proteostasis than a physiological state, or it is simply an  
391 altered state of proteostasis.

## 392 **Acknowledgement**

393 The work was done in KC Lab with the grant DST/SJF/LSA-01/2015-16 as Swarnajayanthi  
394 Fellowship Grant from DST, and partly from BSC0124 from CSIR. Work in DS lab was funded  
395 through BSC0124 project from CSIR. Instrument support was also obtained from Wellcome  
396 Trust-DBT India Alliance (KC lab) and CSIR (DS, KC lab). KC acknowledges CSIR and CSIR-  
397 IGIB for infrastructural support. KV, RD, AC, MR, ZZ acknowledge CSIR; KS and RD  
398 acknowledge UGC; AS acknowledge ICMR, for fellowship support.

399

## 400 **Author Contribution**

401 Conceptualization: Kausik Chakraborty

402 Supervision: Kausik Chakraborty, Dhanasekaran Shanmugam

403 Reagent Generation: Kanika Verma, Kanika Saxena, Rajashekar Donaka

404 Experiments: Kanika Verma, Kanika Saxena, Rajashekar Donaka, Manish Rai, Aseem  
405 Chaphalkar, Anurag Shukla, Zainab Zaidi

406 Analysis: Kanika Verma (FACS/Image/Metabolomics), Kanika Saxena (Mutant library  
407 design/FACS), Anurag Shukla (Metabolomics), Manish Rai (Amplicon  
408 sequencing/transcriptomics), Rohan Dandage (amplicon sequencing), Dhanasekhran  
409 Shanmugam (metabolomics).

410 Manuscript writing: Kausik Chakraborty and Kanika Verma with inputs from all the authors. All  
411 authors read and edited the manuscript.

412

### 413 **Declarations of Interest**

414 The authors declare no competing interests.

415

### 416 **References:**

- 417 1. Mallard, F., Nolte, V., Tobler, R., Kapun, M. & Schlötterer, C. A simple genetic basis of  
418 adaptation to a novel thermal environment results in complex metabolic rewiring in  
419 *Drosophila*. *Genome Biol.* **19**, (2018).
- 420 2. Maitra, A. & Dill, K. Bacterial growth laws reflect the evolutionary importance of energy  
421 efficiency. *Proc Natl Acad Sci USA* **112**, 406–411 (2015).
- 422 3. Park, J. O. *et al.* Metabolite concentrations, fluxes, and free energies imply efficient  
423 enzyme usage. *Nat. Chem. Biol.* **12**, 482–489 (2016).
- 424 4. Santra, M., Farrell, D. & Dill, K. Bacterial proteostasis balances energy and chaperone  
425 utilization efficiently. *Proc Natl Acad Sci USA* **114**, E2654–E2661 (2017).
- 426 5. Yancey, P., Clark, M., Hand, S., Bowlus, R. & Somero, G. Living with water stress:  
427 evolution of osmolyte systems. *Science (80-. )*. **217**, 1214–1222 (1982).
- 428 6. Avanesov, A. S. *et al.* Age- and diet-associated metabolome remodeling characterizes the  
429 aging process driven by damage accumulation. *Elife* **3**, (2014).
- 430 7. Diamant, S., Eliahu, N., Rosenthal, D. & Goloubinoff, P. Chemical Chaperones Regulate  
431 Molecular Chaperones in Vitro and in Cells under Combined Salt and Heat Stresses. *J.*  
432 *Biol. Chem.* **276**, 39586–39591 (2001).
- 433 8. Labbadia, J. *et al.* *Cell Rep.* **21**, 1481–1494 (2017).
- 434 9. Honda, Y., Tanaka, M. & Honda, S. Trehalose extends longevity in the nematode  
435 *Caenorhabditis elegans*. *Aging Cell* **9**, 558–569 (2010).
- 436 10. Yerbury, J. J. *et al.* Walking the tightrope: Proteostasis and neurodegenerative disease.  
437 *Journal of Neurochemistry* **137**, (2016).
- 438 11. Chiti, F. & Dobson, C. M. Protein Misfolding, Amyloid Formation, and Human Disease:  
439 A Summary of Progress Over the Last Decade. *Annu. Rev. Biochem.* **86**, 27–68 (2017).
- 440 12. Chaveroux, C. *et al.* Nutrient shortage triggers the hexosamine biosynthetic pathway via  
441 the GCN2-ATF4 signalling pathway. *Sci. Rep.* **6**, 27278 (2016).
- 442 13. Kandror, O., Bretschneider, N., Kreydin, E., Cavalieri, D. & Goldberg, A. L. Yeast Adapt  
443 to Near-Freezing Temperatures by STRE/Msn2,4-Dependent Induction of Trehalose

- 444 Synthesis and Certain Molecular Chaperones. *Mol. Cell* **13**, 771–781 (2004).
- 445 14. Perić, M. *et al.* TORC1-mediated sensing of chaperone activity alters glucose metabolism  
446 and extends lifespan. *Aging Cell* **16**, 994–1005 (2017).
- 447 15. Zhang, C.-S. *et al.* Fructose-1,6-bisphosphate and aldolase mediate glucose sensing by  
448 AMPK. *Nature* (2017). doi:10.1038/nature23275
- 449 16. Bukau, B., Weissman, J. & Horwich, A. Molecular chaperones and protein quality control.  
450 *Cell* **125**, 443–451 (2006).
- 451 17. Rabinowitz, J. D. & White, E. Autophagy and Metabolism. *Science (80-. )*. **330**, 1344–  
452 1348 (2010).
- 453 18. Suhm, T. *et al.* Mitochondrial Translation Efficiency Controls Cytoplasmic Protein  
454 Homeostasis. *Cell Metab.* **27**, 1309–1322.e6 (2018).
- 455 19. Hartl, F. U. Molecular Chaperones in the Cytosol: from Nascent Chain to Folded Protein.  
456 *Science (80-. )*. **295**, 1852–1858 (2002).
- 457 20. Arsène, F., Tomoyasu, T. & Bukau, B. The heat shock response of Escherichia coli. *Int. J.*  
458 *Food Microbiol.* **55**, 3–9 (2000).
- 459 21. Tokuriki, N. & Tawfik, D. S. Chaperonin overexpression promotes genetic variation and  
460 enzyme evolution. *Nature* **459**, 668–673 (2009).
- 461 22. Farkas, Z. *et al.* Hsp70-associated chaperones have a critical role in buffering protein  
462 production costs. *Elife* **7**, (2018).
- 463 23. Bukau, B. & Horwich, A. L. The Hsp70 and Hsp60 Chaperone Machines. *Cell* **92**, 351–  
464 366 (1998).
- 465 24. Rutherford, S. L. Between genotype and phenotype: protein chaperones and evolvability.  
466 *Nat. Rev. Genet.* **4**, 263–274 (2003).
- 467 25. Tomala, K. & Korona, R. Molecular chaperones and selection against mutations. *Biol.*  
468 *Direct* **3**, 1–16 (2008).
- 469 26. Bandyopadhyay, A. *et al.* Chemical chaperones assist intracellular folding to buffer  
470 mutational variations. *Nat. Chem. Biol.* **8**, 238–245 (2012).
- 471 27. Dandage, R. *et al.* Classification of chemical chaperones based on their effect on protein  
472 folding landscapes. *ACS Chem. Biol.* **10**, 813–820 (2015).
- 473 28. Sévin, D. C., Stählin, J. N., Pollak, G. R., Kuehne, A. & Sauer, U. Global Metabolic  
474 Responses to Salt Stress in Fifteen Species. *PLoS One* **11**, e0148888 (2016).
- 475 29. Yancey, P. H. Organic osmolytes as compatible, metabolic and counteracting  
476 cytoprotectants in high osmolarity and other stresses. *J. Exp. Biol.* **208**, 2819–2830 (2005).
- 477 30. Bolen, D. . & Baskakov, I. V. The osmophobic effect: natural selection of a

- 478 thermodynamic force in protein folding 1 Edited by D. Draper. *J. Mol. Biol.* **310**, 955–  
479 963 (2001).
- 480 31. Ignatova, Z. & Gierasch, L. M. Inhibition of protein aggregation in vitro and in vivo by a  
481 natural osmoprotectant. *Proc. Natl. Acad. Sci.* **103**, 13357–13361 (2006).
- 482 32. Nascimento, C., Leandro, J., Tavares de Almeida, I. & Leandro, P. Modulation of the  
483 Activity of Newly Synthesized Human Phenylalanine Hydroxylase Mutant Proteins by  
484 Low-Molecular-Weight Compounds. *Protein J.* **27**, 392–400 (2008).
- 485 33. Schultz, T., Liu, J., Capasso, P. & Marco, A. de. The solubility of recombinant proteins  
486 expressed in *Escherichia coli* is increased by *otsA* and *otsB* co-transformation. *Biochem.*  
487 *Biophys. Res. Commun.* **355**, 234–239 (2007).
- 488 34. Wolf, E. *et al.* Crystal Structure of a GCN5-Related N-acetyltransferase: *Serratia*  
489 *marcescens* Aminoglycoside 3-N-acetyltransferase. *Cell* **94**, 439–449 (1998).
- 490 35. Cormack, B. P. *et al.* Yeast-enhanced green fluorescent protein (yEGFP): a reporter of  
491 gene expression in *Candida albicans*. *Microbiology* **143**, 303–311 (1997).
- 492 36. Dandage, R. *et al.* Differential strengths of molecular determinants guide environment  
493 specific mutational fates. *PLoS Genet.* **14**, (2018).
- 494 37. Newton, W. A., Beckwith, J. R., Zipser, D. & Brenner, S. Nonsense mutants and polarity  
495 in the *lac* operon of *Escherichia coli*. *J. Mol. Biol.* **14**, 290–6 (1965).
- 496 38. Culham, D. E. *et al.* Isolation and Sequencing of *Escherichia coli* Gene *proP* Reveals  
497 Unusual Structural Features of the Osmoregulatory Proline/Betaine transporter, *ProP*. *J.*  
498 *Mol. Biol.* **229**, 268–276 (1993).
- 499 39. Maurizi, M. R. Proteases and protein degradation in *Escherichia coli*. *Experientia* **48**, 178–  
500 201 (1992).
- 501 40. Baba, T. *et al.* Construction of *Escherichia coli* K-12 in-frame, single-gene knockout  
502 mutants: the Keio collection. *Mol. Syst. Biol.* **2**, 2006.0008 (2006).
- 503 41. Straus, D. B., Walter, W. A. & Gross, C. A. The heat shock response of *E. coli* is  
504 regulated by changes in the concentration of  $\sigma^{32}$ . *Nature* **329**, 348–351 (1987).
- 505 42. Membrillo-Hernández, J., Hernández, H., Kim, S. O., Cook, G. M. & Poole, R. K.  
506 *Paraquat Regulation of hmp (Flavohemoglobin) Gene Expression in Escherichia coli K-*  
507 *12 Is SoxRS Independent but Modulated by sigma S.* *JOURNAL OF BACTERIOLOGY*  
508 **179**, (1997).
- 509 43. Breunig, J. S., Hackett, S. R., Rabinowitz, J. D. & Kruglyak, L. Genetic Basis of  
510 Metabolome Variation in Yeast. *PLoS Genet.* **10**, e1004142 (2014).
- 511 44. Mü, M. *et al.* Functional Metabolomics Describes the Yeast Biosynthetic Regulome. *Cell*  
512 **167**, 553–565 (2016).
- 513 45. Alam, M. T. *et al.* The metabolic background is a global player in *Saccharomyces* gene

- 514 expression epistasis. *Nat. Microbiol.* **1**, 15030 (2016).
- 515 46. Jarosz, D. F., Taipale, M. & Lindquist, S. Protein Homeostasis and the Phenotypic  
516 Manifestation of Genetic Diversity: Principles and Mechanisms. **44**, 189–216 (2010).
- 517 47. Milton, C. C., Ulane, C. M. & Rutherford, S. Control of Canalization and Evolvability by  
518 Hsp90. *PLoS One* **1**, e75 (2006).
- 519 48. Zabinsky, R. A., Mason, G. A., Queitsch, C. & Jarosz, D. F. It's not magic – Hsp90 and  
520 its effects on genetic and epigenetic variation. *Semin. Cell Dev. Biol.* (2018).  
521 doi:10.1016/J.SEMCDB.2018.05.015
- 522 49. Milton, C. C., Ulane, C. M. & Rutherford, S. Control of canalization and evolvability by  
523 Hsp90. *PLoS One* **1**, e75 (2006).
- 524 50. Geiler-Samerotte, K., Sartori, F. M. O. & Siegal, M. L. Decanalizing thinking on genetic  
525 canalization. *Semin. Cell Dev. Biol.* doi:10.1016, (2018).
- 526 51. Rohner, N. *et al.* Cryptic variation in morphological evolution: HSP90 as a capacitor for  
527 loss of eyes in cavefish. *Science* **342**, 1372–5 (2013).
- 528 52. Federici, F., Dupuy, L., Laplaze, L., Heisler, M. & Haseloff, J. Integrated genetic and  
529 computation methods for in planta cytometry. *Nat. Methods* **9**, 483–485 (2012).
- 530 53. Brehme, M. *et al.* A Chaperome Subnetwork Safeguards Proteostasis in Aging and  
531 Neurodegenerative Disease. *Cell Rep.* **9**, 1135–1150 (2014).
- 532 54. Sala, A. J., Bott, L. C. & Morimoto, R. I. Shaping proteostasis at the cellular, tissue, and  
533 organismal level. *Journal of Cell Biology* 1231–1241 (2017). doi:10.1083/jcb.201612111
- 534 55. Ben-Zvi, A., Miller, E. A. & Morimoto, R. I. Collapse of proteostasis represents an early  
535 molecular event in *Caenorhabditis elegans* aging. *Proc. Natl. Acad. Sci.* **106**, 14914–  
536 14919 (2009).
- 537 56. Dai, S. *et al.* Suppression of the HSF1-mediated proteotoxic stress response by the  
538 metabolic stress sensor AMPK. *EMBO J.* **34**, 275–93 (2015).
- 539 57. Taylor, R. C. & Dillin, A. Aging as an event of proteostasis collapse. *Cold Spring Harb.*  
540 *Perspect. Biol.* **3**, a004440 (2011).
- 541 58. Vilchez, D., Saez, I. & Dillin, A. The role of protein clearance mechanisms in organismal  
542 ageing and age-related diseases. *Nat. Commun.* **5**, 5659 (2014).
- 543 59. Koyuncu, S. *et al.* The ubiquitin ligase UBR5 suppresses proteostasis collapse in  
544 pluripotent stem cells from Huntington's disease patients. *Nat. Commun.* **9**, 1–22 (2018).
- 545 60. Kaushik, S. & Cuervo, A. M. Proteostasis and aging. *Nat. Med.* **21**, 1406–1415 (2015).
- 546 61. Gamerding, M. *et al.* Protein quality control during aging involves recruitment of the  
547 macroautophagy pathway by BAG3. *EMBO J.* **28**, 889–901 (2009).

- 548 62. Bolger, A. M., Lohse, M. & Usadel, B. Genome analysis Trimmomatic: a flexible trimmer  
549 for Illumina sequence data. **30**, 2114–2120 (2014).
- 550 63. Bray, N. L., Pimentel, H., Melsted, P. & Pachter, L. Near-optimal probabilistic RNA-seq  
551 quantification. *Nat. Biotechnol.* **34**, 525–527 (2016).
- 552 64. Zhang, C., Zhang, B., Lin, L.-L. & Zhao, S. Evaluation and comparison of computational  
553 tools for RNA-seq isoform quantification. doi:10.1186/s12864-017-4002-1
- 554 65. Leng, N. *et al.* Gene expression EBSeq: an empirical Bayes hierarchical model for  
555 inference in RNA-seq experiments. **29**, 1035–1043 (2013).
- 556 66. Clasquin, M. F., Melamud, E. & Rabinowitz, J. D. LC-MS data processing with MAVEN:  
557 a metabolomic analysis and visualization engine. *Curr. Protoc. Bioinforma.* **Chapter 14**,  
558 Unit14.11 (2012).
- 559 67. Lu, W. *et al.* Metabolomic analysis via reversed-phase ion-pairing liquid chromatography  
560 coupled to a stand alone orbitrap mass spectrometer. *Anal. Chem.* **82**, 3212–21 (2010).
- 561 68. Castanié, M.-P., Bergès, H., Oreglia, J., Prère, M.-F. & Fayet, O. A Set of pBR322-  
562 Compatible Plasmids Allowing the Testing of Chaperone-Assisted Folding of Proteins  
563 Overexpressed in *Escherichia coli*. *Anal. Biochem.* **254**, 150–152 (1997).
- 564 69. Tiwari, S., Kumar, V., Jayaraj, G. G., Maiti, S. & Mapa, K. Unique Structural Modulation  
565 of a Non-Native Substrate by Cochaperone DnaJ. *Biochemistry* **52**, 1011–1018 (2013).
- 566 70. Brown, K. M., Donohue, D. E., D’Alessandro, G. & Ascoli, G. A. A Cross-Platform  
567 Freeware Tool for Digital Reconstruction of Neuronal Arborizations From Image Stacks.  
568 *Neuroinformatics* **3**, 343–360 (2005).
- 569 71. Smith, C. A., Want, E. J., O’Maille, G., Abagyan, R. & Siuzdak, G. XCMS: Processing  
570 mass spectrometry data for metabolite profiling using nonlinear peak alignment, matching,  
571 and identification. *Anal. Chem.* **78**, 779–787 (2006).
- 572 72. Silva, R. R. *et al.* ProbMetab: An R package for Bayesian probabilistic annotation of LC-  
573 MS-based metabolomics. *Bioinformatics* **30**, 1336–1337 (2014).
- 574 73. Yang, F., Moss, L. G. & Phillips, G. N. The molecular structure of green fluorescent  
575 protein. *Nat. Biotechnol.* **14**, 1246–1251 (1996).

576

577

578

579 **TABLES**

580 None

581

582



583 **METHODS**

584

585 **EXPERIMENTAL MODEL AND SUBJECT DETAILS**

586 **Strains, Plasmids and Proteins**

587 *E. coli* strain DH5 $\alpha$  was used for cloning, WT *E. coli* (K-12 BW25113 referred to as BW) strains  
588 was used for expression of arabinose inducible pBAD GFP mCherry and BL21 (DE3) was used  
589 for protein expression and purification. Protein concentrations were determined  
590 spectrophotometrically at 562 nm using BCA kit (Pierce ThermoFisher Scientific). Deletion strains  
591 were obtained from CGSC as part of Keio collection {Baba, 2006 #1843}.

592

593 **METHOD DETAILS**

594 **Construction of mutant GFP mutant library**

595 Mutant GFP library was made in arabinose inducible pBAD vector using random mutagenesis  
596 approach. In the 1<sup>st</sup> step YeGFP (referred to as GFP) was amplified using GFP specific primers  
597 and Mutazyme II polymerase (Agilent Technologies; Cat no.: 200550) in order to incorporate 7-  
598 11 mutations per kb of plasmid. In the 2<sup>nd</sup> step, the product of 1<sup>st</sup> amplification was used as mega-  
599 primer to amplify the entire plasmid with Wt GFP (pBAD GFP mCherry) as template using  
600 Kapa Biosystems Hifi readymix (NC02955239) for 25 cycles with both annealing and extension  
601 at 72°C. The Wt copy of plasmid was digested with DpnI followed by transformation of  
602 chemically competent DH5 $\alpha$  cells. The colonies were scraped and plasmid was prepared in pool  
603 to yield library of GFP mutants. The said library has a total complexity of around 10,000  
604 mutations. The reporter is constructed such that GFP and mCherry are under same arabinose  
605 inducible pBAD promoter in an operon to give readout of GFP according to the mutation created  
606 on it but the mCherry readout will remain similar thus serving as an internal control for  
607 transcription, translation and inducibility.

608 **Screening of mutant GFP library for folding mutants responsive to osmotic stress**

609 Wild type *E. coli* cells (BW) were transformed with mutant GFP library maintaining 10 fold  
610 converge for preserving complexity. Cells were induced with 0.1% arabinose at the time of  
611 inoculation and fluorescence was observed on BD LSR II five hours post induction at 37°C after  
612 diluting cells in 1X PBS and incubating at 37°C for 1 hour. Fluorescence of the mutant library  
613 was studied in a pooled manner against wild type GFP. The entire library was sorted using BD

614 Aria III into populations of compromised mutants (low fluorescent) and active mutants (high  
615 fluorescent) according to the GFP fluorescence. Each of these populations was purified and  
616 plasmids prepared. CSH4 and WG350 strains were transformed with the purified populations  
617 and subjected to osmotic stress with 350mM NaCl. The pool of mutants buffered under osmotic  
618 stress in WG350 was sorted and single clones of GFP were picked from here and checked for  
619 their fluorescence in presence and absence of osmotic stress. The isolated mutants having higher  
620 fluorescence in WG350 under osmotic stress were identified by Sanger's sequencing, also cloned  
621 in pET SUMO under BamHI and HindIII restriction sites and purified using *E. coli* BL21 (DE3)  
622 for further characterization.

### 623 **Growth curve**

624 Single colony of *E.coli* cells were inoculated in LB and grown overnight at 37°C, 200 rpm.  
625 Secondary inoculations were done in LB (control) and LB containing 350mM, 500mM NaCl  
626 additional in honey comb plates with temperature maintained at 37°C, 200 rpm shaking.  
627 Absorbance at 600nm was measured every 30 minutes using Bioscreen C (Oy growth curve Ab  
628 Ltd).

### 629 **Transcriptomics**

630 3 ml of overnight grown culture in LB at 37°C from a single colony was used to re-inoculate at  
631 0.1% culture in 10 ml of LB and grown till OD600 reaches 0.5. The culture was mixed with  
632 equal volume of bacteria RNA protect reagent followed by RNA isolation using Qiagen RNeasy  
633 Mini Kit and TURBO DNA-free kit (AM1907). Quality of RNA was checked using RNA 600  
634 Nano bioanalyzer kit and MICROB Express bacterial mRNA enrichment kit (AM1905) was used  
635 to remove rRNA. 100 ng RNA was used to prepare library using Ion Total RNA-seq kit V2  
636 (4475936) and Ion Xpress RNA-seq barcode 1-16 kit. Final quality check and quantification  
637 were done using DNA HS bioanalyzer (5067-4626) and qubit HS DNA kit (Q32854). Equal  
638 amount of each sample was pooled followed by emulsion PCR (Ion PI Hi-Q OT2 200) and  
639 sequencing (Ion PI Hi-Q sequencing 200 kit) FastQC- tool kit was used for Data QC followed by  
640 Trimmomatic<sup>62</sup> to remove low quality reads. TPM was calculated using Kallisto (Zhang *et al.*,  
641 2017; Bray *et al.*, 2016) followed by identification of differentially expressed genes using EB  
642 sequencing analysis pipeline(<https://bioconductor.org/packages/release/bioc/html/EBSeq.html>)<sup>65</sup>.

643

644

## 645 **Metabolomics**

646 3ml of LB was inoculated with 0.1% inoculum from overnight grown culture and grown till  
647 OD<sub>600</sub>~0.8 at 37°C, 200 rpm. Cells equivalent to 0.1 OD were harvested at 14000 rpm, 1 min,  
648 4°C. Supernatant was discarded and 200ul 80% chilled methanol (80% MetOH, PIPES 1ng/μl,  
649 U13C-U15N-glutamine in MS grade water) was added to the pellet and incubated in ice for 5  
650 minutes for quenching. This is followed by sonication in water bath for 15 min at 4°C with  
651 intermittent vortexing. Metabolites were collected in the supernatant by centrifugation at 14000  
652 rpm for 1 min at 4°C. Previous step was repeated twice by adding 100μl 80% chilled methanol  
653 each time to increase metabolite yield and stored in -80 refrigerator till further analysis. The  
654 untargeted mass profile (or metabolic profile) was acquired in Thermo Q-exactive Orbitrap  
655 coupled with Thermo Accucore RP C18 150\*2.1, 2.6μM column with flow rate of 200μl/min.  
656 Ion masses from 80-1000m/z were collected in negative ion mode. The raw output files obtained  
657 from mass spec were converted into .mzXML files using proteowizard tool  
658 (<http://proteowizard.sourceforge.net/>) followed by identification and analysis using  
659 metabolomics data processing software platformXCMS and MAVEN([http://genomics-](http://genomics-pubs.princeton.edu/mzroll/index.php?show=index)  
660 [pubs.princeton.edu/mzroll/index.php?show=index](http://genomics-pubs.princeton.edu/mzroll/index.php?show=index))<sup>66,67</sup>.

661

## 662 **Minimum Inhibitory Concentration (MIC) study of Gm-R glycine doublet mutants**

663 The library of Gm-R glycine doublet mutants as reported previously (Bandyopadhyay *et al.*,  
664 2012) were grown overnight in LB containing ampicillin(100μg/ml) and Arabinose(0.1%) at  
665 37°C, 200 rpm. Secondary inoculations were done in LB containing Ampicillin(100μg/ml),  
666 Arabinose(0.1%) and increasing concentrations of gentamicin (0-800 μg/ml) incubated for 16hrs  
667 at 37°C and 200rpm. Growth was assessed by measuring absorbance at 600nm in flat bottom 96  
668 well microtiter plate using TECAN infinite 200 pro. Absorbance value for each sample under  
669 selection pressure by gentamicin was normalized against absorbance of respective unselected  
670 sample. To check for mutation specific effects it was important to normalize for the growth  
671 differences of Wt-GmR transformed in the different strains that were being compared. To obtain  
672 a semi-quantitative indication for activity of the different mutants, wt-GmR transformed cells  
673 was grown as control, and the MIC for the mutants were normalized with respect to the MIC of  
674 wt-GmR in the same strains. This allowed us to obtain mutation-specific effects in activity in the  
675 different strains used.

## 676 **Amplicon sequencing**

677 Plasmids were isolated from unselected (no gentamicin) and selected cells under gentamicin  
678 selection pressure. Gm-R gene was amplified for 25 cycles using Kapa Hifi Hotstart polymerase.  
679 The 500bp amplicons were gel purified and quantified using qubit. 150ng of purified products  
680 was used for library preparation Ion Plus Fragment Library Kit (part no.-4471252) and Ion  
681 Xpress Barcode Adapters (4471250, 4474009). The final library was quantified and equal  
682 amount of DNA library of 8 samples were pooled and emulsion PCR and sequenced using Ion  
683 PGM Hi-Q OT2 Kit (part no A29900) and Ion PGM Hi-Q sequencing kit (part no.A30044) on  
684 Ion Torrent platform. Analysis was done using FastqQC followed by trimmomatic (cutoff Q15)  
685 and quality check by fastQC. Good reads were aligned to Gm-R gene followed by variant calling  
686 and fitness score calculation [www.github.com/kc-lab/dms2dfe](http://www.github.com/kc-lab/dms2dfe)<sup>36</sup>.

687

## 688 **Quantitation of activity of Gm-R Glycine-doublet substitution mutants**

689 To obtain a measure for activity of the mutants, we obtained the read count for each of the  
690 mutant and normalized with respect to the coverage at the respective positions. The relative read-  
691 counts of the mutants did not differ between the different strains in the absence of any selection  
692 pressure for GmR indicating that the library was homogeneously covered in all the  
693 transformations. We thereby did not obtain relative enrichment but compared the coverage-  
694 normalized read-counts between the different strains and conditions to obtain differences in  
695 activity. All the amplicon based sequencing experiments were done in duplicates.

696 To obtain relative activity of the different mutants in one strain (for comparison of activity of  
697 mutants as measured by amplicon sequencing and MIC assay as shown in Figure S1E) we  
698 obtained the enrichment score for each mutant by dividing the normalized read count for each  
699 mutant with Gm selection and in the absence of Gm-selection. z-scores were obtained for each of  
700 the mutant assuming a normal distribution. A positive z-score indicates higher than average  
701 activity while a negative z-score indicated a lower than average activity. Mutants were picked  
702 that had a high z-score (1.4, more active than average) or low z-score (-1.6 less active than  
703 average) or one close to zero (z-score = -0.4, activity close to average) for checking the MICs.  
704 Note: z-score was not used to obtain the significance of difference but the mutants that exhibited  
705 either high or low activity.

706

### 707 **Chase for degradation of protein**

708 From overnight grown culture in LB containing Ampicillin(100µg/ml) secondary cultures were  
709 inoculated with 0.1% inoculum in 100 ml LB containing Ampicillin(100µg/ml) and grown till  
710 OD<sub>600</sub> reached 0.5. Cells were harvested and resuspended in 10ml of the spent media. GFP was  
711 induced using 0.5% arabinose for 5 minutes at 37°C and 200 rpm. Chloramphenicol (50µg/ml)  
712 was used to arrest translation. 1 ml of culture was taken out for uninduced, 0 min, 15 min, 30  
713 min, 60 min, 120 min post translation arrest, harvested, snap chilled and protein was collected by  
714 lysing cells resuspended in 1X PBS using 2X lysis buffer (Tris pH 6.8(80mM), SDS 1%,  
715 glycerol 10%). 30µg of protein estimated using Pierce™ BCA Protein Assay Kit and loaded on  
716 SDS-PAGE followed by Western blotting probing for GFP using Rabbit anti-GFP (Ab290) and  
717 HRP conjugated goat anti-rabbit IgG (SantaCruz Biotechnology).

718

### 719 ***In-vivo* crosslinking:**

720 100ml of LB medium (with and without 350mM of NaCl) containing Ampicillin (100µg/ml) was  
721 inoculated with overnight grown cells at 0.1% inoculum for each strain. Cells were grown till  
722 they reach O.D<sub>600</sub> 0.5 and harvested at 4000 rpm for 10 mins at RT. Pellet was finally  
723 resuspended in 2ml of spent media and induced for 5 minutes at 37°C with 0.5% arabinose for  
724 GFPexpression. Cells were harvested and resuspended in 2 ml of 1X PBS containing protease  
725 inhibitor cocktail (Roche) and 500µl of resuspended cells was taken as a control for  
726 uncrosslinked sample (referred to as -DSG in the text). To the remaining cells, 300µM of Di (N-  
727 succinimidyl) glutarate (DSG) was added and incubated at 37°C for 10 minutes for crosslinking.  
728 Reaction was quenched with 100mM of Tris, pH 8 for 5-10 minutes at room temperature. Cells  
729 were harvested at 13000 rpm, 2 minutes at room temperature and lysed by Freeze-thaw method  
730 in the presence of protease inhibitors. 30µg of protein was loaded on SDS PAGE followed by  
731 Western Blotting.

### 732 **Western Blotting Experiment**

733 *E. coli* cells were inoculated in LB and grown at 37°C for five hours. Cells were harvested and  
734 resuspended in 1X PBS (Himedia; ML023). Equal volume of 2X lysis buffer was added and  
735 boiled at 95°C for 15 minutes followed by spin at highest rpm for 15 minutes. The supernatant  
736 was collected and estimated for the amount of protein. 30µg of protein was used for SDS-PAGE

737 and Western Blotting post transferring onto nitrocellulose membrane (Millipore; HATF00010).  
738 The blots were decorated with antibodies against GroEL (Enzo; 9A1/2) and DnaK (Enzo; 9E2/2)  
739 isolated from mouse. Blots were developed using HRP conjugated Goat anti-mouse IgG  
740 (Genscript) and Luminata crescendo (Millipore). Densitometric analysis was done using ImageJ.  
741 (Rasband, W.S., ImageJ, U. S. National Institutes of Health, Bethesda, Maryland, USA,  
742 <http://imagej.nih.gov/ij/>, 1997-2011).

743

#### 744 **GFP refolding assay**

745 60 $\mu$ M native GFP (or mutant) was mixed with 8M GuHCl prepared in GFP refolding buffer  
746 (Buffer-A) (Tris-Cl (25 mM), KCl (150mM), MgCl<sub>2</sub> (10mM), pH 7.4) in 1:3 ratio. After  
747 incubation at 25°C for 1 hour, refolding of GFP was initiated in Buffer-A by diluting the mixture  
748 100 fold (final GFP concentration 150 nM). Real time fluorescence of GFP was monitored in  
749 Fluorolog 3 spectrophotometer (Horiba Jobin Yvon, with operating software FluorEssence v3.0)  
750 at 25°C, with excitation wavelength 488 nm (2 nm slit width) and emission wavelength 515 nm  
751 (5nm slit width), enabling ‘anti-photobleaching’ mode. The data acquired from refolding assays  
752 was analysed in OriginPro 8 (OriginLabcorporation).

753

#### 754 **Isolation of protein free cell extract**

755 *E. coli* K12 (BW35113) strain was grown in 5 ml LB broth at 37°C, 200 RPM orbital shaking for  
756 overnight and this primary culture was used to inoculate a 500 ml secondary culture in LB broth.  
757 After growing the secondary culture in identical conditions for 3 hours (OD 0.7-0.8), the culture  
758 was centrifuged at 4000 RPM for 30 minutes at 37°C. 5 ml of boiling hot ultrapure water was  
759 added directly to the pellet, resuspending it vigorously, and the cell suspension was immediately  
760 collected in a glass test tube. The glass tube was kept in a boiling water bath for 30 minutes,  
761 ensuring maximum lysis of cells and precipitation of proteins. The resulting suspension was  
762 cooled down to room temperature and was centrifuged at 13000 RPM for 20 minutes. Absence  
763 of protein in the supernatant, the protein free cell extract, was confirmed by Bradford protein  
764 estimation assay.

765

766

767

768 **Simulation**

769 Numerical simulations was performed using the ODEs defined in Figure S3 to model a basic  
770 framework to check the apparent rate of degradation as a function of folding rate in vivo. The  
771 simulation was set up with 1000 $\mu$ M S (pool of DNA/RNA that is competent to make proteins). S  
772 can form U (nascent polypeptides) with an overall unimolecular rate constant of  $k_{trans}$  (a  
773 simplistic combination of rates of transcription and translation). The pool of U can either convert  
774 to F (folded GFP) or be degraded with the unimolecular rate constants of  $k_f$  and  $k_{deg}$ ,  
775 respectively. The pool of S can be blocked by I (inhibitor of translation) with a rate constant of  
776  $k_i$ . This was included to mimic translation arrest by chloramphenicol. The simulation was run in  
777 the absence of I for 300 seconds. Following this, 1mM of I was dosed into the simulation to  
778 rapidly quench S. Following this we monitored the total concentration of uncleaved GFP (U+F)  
779 over time to mimic the results obtained from the chase experiments performed with anti-GFP  
780 antibodies.

781

782 **QUANTIFICATION AND STATISTICAL ANALYSIS**

783 Student's t test and R package for non linear regression was used for statistical analysis. Flow-  
784 cytometry data was analyzed using octave

785 **DATA AND SOFTWARE AVAILABILITY**

786 All data are provided in the manuscript. We did not develop any new software.

787

788

789 **KEY RESOURCES TABLE**

| REAGENT                                                                                                                                                                            | SOURCE                      | IDENTIFIER   |
|------------------------------------------------------------------------------------------------------------------------------------------------------------------------------------|-----------------------------|--------------|
| <b>Antibodies</b>                                                                                                                                                                  |                             |              |
| Anti GroEL (E.coli) mouse monoclonal                                                                                                                                               | ENZO                        | 9A1/2        |
| Anti DnaK (E.coli) mouse monoclonal                                                                                                                                                | ENZO                        | 8E2/2        |
| Anti DnaJ (E.coli) rabbit polyclonal                                                                                                                                               | ENZO                        | SPA410       |
| Anti Tig (E.coli) rabbit polyclonal                                                                                                                                                | Genescript                  | A01329       |
| Anti GFP rabbit polyclonal                                                                                                                                                         | Abcam                       | Ab290        |
| Anti RecA rabbit polyclonal                                                                                                                                                        | Abcam                       | Ab125096     |
| Anti Mouse secondary                                                                                                                                                               | Santa Cruz<br>Biotechnology | SC2005       |
| Anti rabbit secondary                                                                                                                                                              | Santa Cruz<br>Biotechnology | SC2030       |
| Di(N-succinimidyl) glutarate (DSG)                                                                                                                                                 | Sigma                       | 80424        |
| <b>Bacterial and Virus Strains</b>                                                                                                                                                 |                             |              |
| <i>E. coli</i> BL21 (DE3)                                                                                                                                                          |                             |              |
| <i>E. coli</i> DH5 $\alpha$                                                                                                                                                        |                             |              |
| BW ( <i>E. coli</i> K12, BW25113)<br>F <sup>-</sup> , DE(araD-araB)567, lacZ4787(del)::rrnB-3,<br>LAM <sup>-</sup> , rph-1, DE(rhaD-rhaB)568, hsdR514                              | (Baba <i>et al.</i> , 2006) | CGSC#: 7636  |
| $\Delta$ Tig (JW0426-1)<br>F <sup>-</sup> , $\Delta$ (araD-araB)567, $\Delta$ lacZ4787(::rrnB-3), $\Delta$ tig-<br>722::kan, $\lambda$ -, rph-1, $\Delta$ (rhaD-rhaB)568, hsdR514  | (Baba <i>et al.</i> , 2006) | CGSC#: 8589  |
| $\Delta$ dnaK (JW0013-4)<br>F <sup>-</sup> , $\Delta$ (araD-araB)567, $\Delta$ lacZ4787(::rrnB-3), $\lambda$ -, rph-<br>1, $\Delta$ dnaK734::kan, $\Delta$ (rhaD-rhaB)568, hsdR514 | (Baba <i>et al.</i> , 2006) | CGSC#: 8342  |
| $\Delta$ dnaJ (JW0014-1)<br>F <sup>-</sup> , $\Delta$ (araD-araB)567, $\Delta$ lacZ4787(::rrnB-3), $\lambda$ -,rph-<br>1, $\Delta$ dnaJ735::kan, $\Delta$ (rhaD-rhaB)568, hsdR514  | (Baba <i>et al.</i> , 2006) | CGSC#: 8343  |
| $\Delta$ clpA<br>F <sup>-</sup> , $\Delta$ (araD-araB)567, $\Delta$ lacZ4787(::rrnB-3), $\lambda$ -,<br>$\Delta$ clpA783::kan,rph-1, $\Delta$ (rhaD-rhaB)568, hsdR514              | (Baba <i>et al.</i> , 2006) | CGSC#: 8898  |
| $\Delta$ clpP<br>F <sup>-</sup> , $\Delta$ (araD-araB)567, $\Delta$ lacZ4787(::rrnB-3),<br>$\Delta$ clpP723::kan, $\lambda$ -,rph-1, $\Delta$ (rhaD-rhaB)568,<br>hsdR514           | (Baba <i>et al.</i> , 2006) | CGSC#: 8590  |
| $\Delta$ clpX<br>F <sup>-</sup> , $\Delta$ (araD-araB)567, $\Delta$ lacZ4787(::rrnB-3),<br>$\Delta$ clpX724::kan, $\lambda$ -, rph-1, $\Delta$ (rhaD-rhaB)568,<br>hsdR514          | (Baba <i>et al.</i> , 2006) | CGSC#: 8591  |
| $\Delta$ hslU<br>F <sup>-</sup> , $\Delta$ (araD-araB)567, $\Delta$ lacZ4787(::rrnB-3), $\lambda$ -, rph-<br>1, $\Delta$ (rhaD-rhaB)568, $\Delta$ hslU790::kan, hsdR514            | (Baba <i>et al.</i> , 2006) | CGSC#: 10817 |



|                                                                                                                   |                                      |              |
|-------------------------------------------------------------------------------------------------------------------|--------------------------------------|--------------|
| <i>ΔhslV</i><br>F-, Δ(araD-araB)567, ΔlacZ4787(::rrnB-3), λ-, rph-1, Δ(rhaD-rhaB)568, ΔhslV720::kan, hsdR514      | (Baba <i>et al.</i> , 2006)          | CGSC#: 10818 |
| <i>ΔsecB</i><br>F-, Δ(araD-araB)567, ΔlacZ4787(::rrnB-3), λ-, ΔsecB721::kan, rph-1, Δ(rhaD-rhaB)568, hsdR514      | (Baba <i>et al.</i> , 2006)          | CGSC#: 10640 |
| CSH4<br>F, lacZ1125, λtrpA49(Am), relA1, rpsL150(strR), spoT                                                      | (Newton <i>et al.</i> , 1965)        | CGSC#: 8196  |
| WG350<br>F-, lacZ1125, λ, Δ(putA-putP)101, trpA49(Am), ΔproU-600, relA1, rpsL150(strR), spoT1, Δ(proP-melB)212    | (Culham <i>et al.</i> , 1993)        | CGSC#: 8195  |
| <b>Oligonucleotides</b>                                                                                           |                                      |              |
| GFP Forward primer (to clone in pET SUMO)<br>CCCGGATCCATGTCTAAAGGTGAAGAATTA<br>TTCAGTGGTGTTC                      | This Paper                           |              |
| GFP Reverse primer (to clone in pET SUMO)<br>CCCAAGCTTTTATTTGTACAATTCATCCATA<br>CCATGGGTAATA                      | This Paper                           |              |
| GFP Forward primer (to clone in pBAD vector)<br>TGTGCTGAATTCACATATATGTCTAAAGGT<br>GAAGAATTATTCA                   | This Paper                           |              |
| GFP Reverse primer (to clone in pBAD vector)<br>ACGGCCAAGCTTTTATTTGTACAATTCATCC<br>ATACCATGGG                     | This Paper                           |              |
| RBS mCherry Forward primer (to clone in pBAD vector)<br>ACAAAGCTTTCATACCCGTTTTTTGGGCTA<br>ACAGGAGGAATTAACCATGGTGA | This Paper                           |              |
| RBS mCherry Reverse primer (to clone in pBAD vector)<br>TCTAAGCTTCTACTTGTACAGCTCGTC                               | This Paper                           |              |
| <b>Recombinant DNA</b>                                                                                            |                                      |              |
| pOFX ELES (pOFX tac-SL2)                                                                                          | (Castanié <i>et al.</i> , 1997)      |              |
| pOFX DnaK/J/GrpE (pOFX tac-KJE1)                                                                                  | (Castanié <i>et al.</i> , 1997)      |              |
| pET duet1 dnaK                                                                                                    | (Tiwari <i>et al.</i> , 2013)        |              |
| pET duet1 dnaJ                                                                                                    | (Tiwari <i>et al.</i> , 2013)        |              |
| pET duet1 grpE                                                                                                    | (Tiwari <i>et al.</i> , 2013)        |              |
| pET duet1 Mge1                                                                                                    | (Tiwari <i>et al.</i> , 2013)        |              |
| pET SUMO sGFP                                                                                                     | Sadat & Mapa (in process)            |              |
| pBAD GmR                                                                                                          | (Bandyopadhyay <i>et al.</i> , 2012) |              |
| pBAD 25G GmR                                                                                                      | This Paper                           |              |
| pBAD 27G GmR                                                                                                      | This Paper                           |              |

|                                |                                                                                                                             |  |
|--------------------------------|-----------------------------------------------------------------------------------------------------------------------------|--|
| pBAD 37G GmR                   | This Paper                                                                                                                  |  |
| pBAD 39G GmR                   | This Paper                                                                                                                  |  |
| pET SUMO c1GFP                 | This Paper                                                                                                                  |  |
| pET SUMO c6FP                  | This Paper                                                                                                                  |  |
| pET SUMO c7GFP                 | This Paper                                                                                                                  |  |
| pET SUMO c8GFP                 | This Paper                                                                                                                  |  |
| pBAD GFP mCherry               | This Paper                                                                                                                  |  |
| pBAD c1GFP mCherry             | This Paper                                                                                                                  |  |
| pBAD c6GFP mCherry             | This Paper                                                                                                                  |  |
| pBAD c7GFP mCherry             | This Paper                                                                                                                  |  |
| pBAD c8GFP mCherry             | This Paper                                                                                                                  |  |
| <b>Software and Algorithms</b> |                                                                                                                             |  |
| Chimera                        |                                                                                                                             |  |
| Proteowizard                   | (Brown <i>et al.</i> , 2005)                                                                                                |  |
| XCMS                           | (Smith <i>et al.</i> , 2006; Silva <i>et al.</i> , 2014)                                                                    |  |
| Maven                          | (Lu <i>et al.</i> , 2010; Clasquin, Melamud and Rabinowitz, 2012)                                                           |  |
| FastQC                         | <a href="http://www.citeulike.org/user/nailest/author/Andrews:S">http://www.citeulike.org/user/nailest/author/Andrews:S</a> |  |
| Trimmomatic                    | (Bolger, Lohse and Usadel, 2014)                                                                                            |  |
| Kallisto                       | (Zhang <i>et al.</i> , 2017; Bray <i>et al.</i> , 2016)                                                                     |  |
| EBseq                          | (Leng <i>et al.</i> , 2013)                                                                                                 |  |
| ImageJ                         |                                                                                                                             |  |
| Origin Pro8                    |                                                                                                                             |  |
| Deposited Data                 |                                                                                                                             |  |

**Table S1: List of metabolites along with their log<sub>2</sub> of fold change and p- values obtained by untargeted metabolite profiling and analysis using MAVEN platform (Related to Figure 1 and 2)**

| S.no | med Mz   | medR t   | Max Quality | compound                  | Log <sub>2</sub> fold change |                 |                   |                      | Log <sub>10</sub> p-value |                 |                   |                      |
|------|----------|----------|-------------|---------------------------|------------------------------|-----------------|-------------------|----------------------|---------------------------|-----------------|-------------------|----------------------|
|      |          |          |             |                           | CSH4 - WG350                 | CSH4 - CSH4 (S) | WG350 - WG350 (S) | CSH4 (S) - WG350 (S) | CSH4 - WG350              | CSH4 - CSH4 (S) | WG350 - WG350 (S) | CSH4 (S) - WG350 (S) |
| 1    | 363.0344 | 2.041682 | 0.848391    | N-Acetylputrescine        | 0.00                         | -14.03          | -14.29            | -0.26                | 0.01                      | 0.97            | 1.54              | 0.45                 |
| 2    | 283.0684 | 4.029608 | 0.849596    | Geranyl-PP                | 0.00                         | -13.99          | -13.89            | 0.10                 | 0.05                      | 1.67            | 1.43              | 0.20                 |
| 3    | 151.025  | 1.858412 | 0.819399    | fructose-1-6-bisphosphate | 0.00                         | -12.65          | 0.00              | 12.65                | 0.00                      | 2.24            | 0.43              | 5.16                 |
| 4    | 116.0705 | 2.341379 | 0.828605    | succinate                 | 0.00                         | -11.67          | -25.78            | -14.11               | 0.43                      | 1.60            | 2.15              | 1.80                 |
| 5    | 243.0622 | 2.131804 | 0.848934    | UMP                       | 2.10                         | -4.63           | -4.86             | 1.87                 | 0.49                      | 2.56            | 1.80              | 1.80                 |
| 6    | 167.0204 | 2.374183 | 0.847362    | orotidine-5-phosphate     | 10.98                        | -4.25           | -14.62            | 0.61                 | 1.12                      | 4.78            | 1.71              | 1.38                 |
| 7    | 323.0291 | 3.537884 | 0.851401    | betaine                   | -0.93                        | -4.17           | -7.94             | -4.70                | 0.53                      | 0.95            | 0.98              | 1.78                 |
| 8    | 606.0748 | 4.036123 | 0.851434    | Octoluse Bisphosphate     | 1.06                         | -3.88           | -4.69             | 0.24                 | 0.15                      | 1.00            | 1.04              | 0.28                 |
| 9    | 565.0482 | 4.056136 | 0.857477    | tryptophan                | 0.44                         | -3.75           | -4.18             | 0.01                 | 0.05                      | 1.93            | 1.71              | 0.22                 |
| 10   | 402.9949 | 2.973083 | 0.84958     | thiamine-phosphate        | 0.12                         | -3.73           | -2.99             | 0.87                 | 0.01                      | 1.34            | 1.15              | 3.48                 |
| 11   | 180.0657 | 2.219842 | 0.858241    | fumarate                  | -2.93                        | -3.27           | -6.82             | -6.49                | 0.88                      | 0.51            | 3.44              | 1.03                 |
| 12   | 203.0819 | 1.413762 | 0.840261    | FMN                       | 1.54                         | -2.86           | -1.06             | 3.34                 | 1.17                      | 1.98            | 0.65              | 4.25                 |
| 13   | 203.0819 | 1.505575 | 0.858171    | asparagine                | -1.04                        | -2.73           | 0.10              | 1.79                 | 0.62                      | 2.12            | 0.10              | 3.83                 |
| 14   | 341.1089 | 2.038149 | 0.846411    | glutathione disulfide     | -1.96                        | -2.52           | -0.13             | 0.43                 | 1.29                      | 1.15            | 0.39              | 0.24                 |
| 15   | 421.0756 | 1.887725 | 0.851835    | CMP                       | -1.08                        | -2.37           | 1.97              | 3.26                 | 0.47                      | 1.60            | 1.10              | 1.82                 |
| 16   | 241.0827 | 2.019653 | 0.856852    | GMP                       | 1.22                         | -2.33           | -2.11             | 1.44                 | 1.97                      | 4.11            | 2.86              | 3.62                 |
| 17   | 344.0691 | 2.006949 | 0.846896    | UDP                       | -0.13                        | -2.28           | -1.68             | 0.47                 | 0.10                      | 4.33            | 3.04              | 0.73                 |
| 18   | 424.039  | 1.499295 | 0.860667    | aspartate                 | -0.40                        | -1.99           | 2.16              | 3.75                 | 0.64                      | 3.32            | 2.82              | 5.07                 |
| 19   | 264.1045 | 1.446013 | 0.858174    | trehalose/sucrose         | 1.55                         | -1.89           | -1.60             | 1.84                 | 3.11                      | 3.67            | 2.71              | 3.08                 |
| 20   | 866.1249 | 1.45047  | 0.857708    | Cellobiose                | 1.55                         | -1.89           | -1.60             | 1.84                 | 3.11                      | 3.67            | 2.71              | 3.08                 |
| 21   | 117.0186 | 2.093047 | 0.854168    | N-Acetyl-L-alanine        | -1.80                        | -1.77           | 0.08              | 0.05                 | 0.78                      | 1.01            | 0.38              | 0.06                 |
| 22   | 171.0065 | 3.843684 | 0.849186    | IMP                       | -0.41                        | -1.66           | -1.07             | 0.18                 | 0.38                      | 2.09            | 1.54              | 0.45                 |
| 23   | 253.0099 | 2.067247 | 0.861783    | Pyroglutamic acid         | -1.85                        | -1.53           | -0.12             | -0.43                | 0.64                      | 0.67            | 0.41              | 0.80                 |
| 24   | 368.9989 | 3.985863 | 0.849202    | S-methyl-5-thioadenosine  | -0.27                        | -1.28           | -1.28             | -0.28                | 0.15                      | 1.34            | 1.39              | 0.43                 |
| 25   | 266.0707 | 1.685908 | 0.833351    | ribose-phosphate          | -0.60                        | -1.15           | 0.82              | 1.37                 | 0.75                      | 1.65            | 1.10              | 2.80                 |
| 26   | 296.0806 | 2.066397 | 0.852619    | N-acetyl-L-ornithine      | 0.30                         | -1.10           | -1.11             | 0.30                 | 0.35                      | 2.75            | 2.67              | 0.64                 |
| 27   | 383.     | 3.042    | 0.771       | Acetyllysine              | 0.05                         | -0.96           | -0.98             | 0.04                 | 0.11                      | 1.80            | 2.12              | 0.13                 |

|    |          |          |          |                               |       |       |       |       |      |      |      |      |
|----|----------|----------|----------|-------------------------------|-------|-------|-------|-------|------|------|------|------|
|    | 1152     | 196      | 733      | e                             |       |       |       |       |      |      |      |      |
| 28 | 229.0112 | 2.020989 | 0.85325  | adenosine                     | 0.89  | -0.91 | -1.32 | 0.48  | 0.93 | 2.14 | 2.15 | 2.26 |
| 29 | 375.131  | 2.323842 | 0.84781  | xanthosine-5-phosphate        | -0.18 | -0.89 | -0.73 | -0.01 | 0.04 | 1.82 | 2.08 | 0.03 |
| 30 | 176.935  | 4.759889 | 0.852717 | 2-Isopropylmalic acid         | 0.23  | -0.74 | -0.66 | 0.30  | 0.24 | 1.32 | 1.66 | 0.68 |
| 31 | 128.0341 | 1.83335  | 0.853449 | dCDP                          | -0.36 | -0.47 | 0.46  | 0.58  | 0.07 | 1.29 | 0.49 | 2.60 |
| 32 | 168.0656 | 2.160493 | 0.853901 | xanthosine                    | 0.45  | -0.45 | -0.52 | 0.37  | 1.07 | 1.80 | 1.32 | 1.07 |
| 33 | 114.0551 | 10.95572 | 0.73141  | P-hydroxybenzoate             | -0.33 | -0.42 | -0.22 | -0.14 | 0.67 | 0.25 | 1.34 | 0.49 |
| 34 | 225.0392 | 11.50664 | 0.84889  | Sedoheptulose biphosphate     | -0.26 | -0.24 | -0.07 | -0.09 | 0.28 | 0.00 | 0.14 | 0.08 |
| 35 | 145.0301 | 1.69376  | 0.833608 | cystathionine                 | 0.19  | -0.23 | -1.06 | -0.64 | 0.54 | 0.38 | 1.94 | 0.55 |
| 36 | 218.1029 | 1.981234 | 0.860063 | hypoxanthine                  | -0.22 | -0.19 | -0.01 | -0.04 | 0.52 | 0.74 | 0.11 | 0.03 |
| 37 | 137.0232 | 1.572158 | 0.857927 | glutamine                     | -0.07 | -0.16 | -0.09 | 0.00  | 0.28 | 0.01 | 0.07 | 0.06 |
| 38 | 367.0198 | 1.393888 | 0.84899  | UDP-D-glucose                 | -0.14 | -0.14 | -0.10 | -0.09 | 0.64 | 0.59 | 0.14 | 0.02 |
| 39 | 131.0814 | 6.98723  | 0.856877 | Kynurenine                    | 0.22  | -0.11 | -0.34 | -0.02 | 0.22 | 0.36 | 1.13 | 0.16 |
| 40 | 399.0131 | 5.573004 | 0.850927 | riboflavin                    | -0.10 | -0.09 | -0.13 | -0.14 | 0.07 | 0.04 | 0.50 | 0.29 |
| 41 | 319.0463 | 5.199954 | 0.849735 | Thiamine pyrophosphate        | -0.03 | -0.09 | -0.05 | 0.01  | 0.12 | 0.54 | 0.56 | 0.12 |
| 42 | 146.0447 | 5.07694  | 0.840613 | Octulose 8/1P                 | 0.10  | -0.08 | -0.32 | -0.14 | 0.20 | 0.50 | 0.53 | 0.25 |
| 43 | 742.0695 | 3.301201 | 0.735053 | valine                        | 0.22  | -0.08 | -0.36 | -0.06 | 0.27 | 0.36 | 1.11 | 0.22 |
| 44 | 664.118  | 1.939427 | 0.662212 | cyclic-AMP                    | 0.27  | -0.02 | 0.62  | 0.91  | 0.55 | 0.64 | 1.54 | 1.10 |
| 45 | 662.1027 | 8.18236  | 0.852802 | tryptophan                    | 0.28  | -0.01 | -0.40 | -0.11 | 0.20 | 0.13 | 0.99 | 0.61 |
| 46 | 175.0351 | 1.743987 | 0.85161  | glucose-6-phosphate           | 0.35  | 0.04  | 1.96  | 2.27  | 0.75 | 0.07 | 0.43 | 3.75 |
| 47 | 129.1023 | 6.07219  | 0.850308 | thiamine                      | 0.00  | 0.05  | -0.08 | -0.14 | 0.13 | 0.05 | 0.50 | 0.34 |
| 48 | 173.0922 | 2.708844 | 0.81459  | pantothenate                  | 0.40  | 0.06  | -0.53 | -0.18 | 0.33 | 0.03 | 1.38 | 0.97 |
| 49 | 130.0498 | 5.998872 | 0.854558 | biotin                        | 0.14  | 0.06  | -0.17 | -0.09 | 0.19 | 0.08 | 0.77 | 0.16 |
| 50 | 187.0716 | 1.777959 | 0.832413 | shikimate-3-phosphate         | 0.04  | 0.06  | 0.20  | 0.18  | 0.44 | 0.47 | 1.26 | 0.37 |
| 51 | 188.0556 | 1.504867 | 0.772704 | N-acetylglutamine             | 0.04  | 0.09  | 0.16  | 0.10  | 0.02 | 0.01 | 1.50 | 1.00 |
| 52 | 300.0466 | 1.719046 | 0.848407 | guanine                       | -0.13 | 0.13  | 0.24  | -0.02 | 0.45 | 0.03 | 0.79 | 0.22 |
| 53 | 179.0552 | 1.501844 | 0.85144  | inosine                       | -0.21 | 0.17  | 1.76  | 1.37  | 0.00 | 0.07 | 2.49 | 1.18 |
| 54 | 134.0294 | 2.00565  | 0.855251 | dGMP                          | 0.40  | 0.25  | 0.12  | 0.27  | 0.68 | 0.33 | 0.71 | 0.24 |
| 55 | 148.0426 | 3.28745  | 0.850251 | D-sedoheptulose-1/7-phosphate | 0.19  | 0.26  | 0.12  | 0.05  | 0.03 | 0.17 | 0.99 | 0.45 |
| 56 | 133.0131 | 1.936306 | 0.677158 | methionine                    | -0.17 | 0.29  | 0.50  | 0.05  | 0.16 | 1.54 | 0.85 | 0.13 |

|    |          |          |          |                                   |       |      |       |       |      |      |      |      |
|----|----------|----------|----------|-----------------------------------|-------|------|-------|-------|------|------|------|------|
| 57 | 145.0971 | 1.390545 | 0.850053 | UDP-N-acetylglucosamine           | -0.21 | 0.40 | 0.18  | -0.42 | 0.17 | 0.40 | 0.66 | 0.17 |
| 58 | 205.0347 | 2.536442 | 0.851966 | proline                           | -0.88 | 0.40 | -1.20 | -2.48 | 0.33 | 0.24 | 0.81 | 1.84 |
| 59 | 289.1155 | 1.833144 | 0.851898 | α-ketoglutarate                   | 0.38  | 0.42 | 1.06  | 1.02  | 1.23 | 1.41 | 2.15 | 1.78 |
| 60 | 207.077  | 2.012048 | 0.833829 | tyrosine                          | 0.15  | 0.48 | 0.51  | 0.18  | 0.70 | 2.96 | 2.09 | 1.13 |
| 61 | 267.0725 | 1.519962 | 0.766428 | Amino adipic acid                 | 0.22  | 0.49 | 0.01  | -0.26 | 0.38 | 1.51 | 0.22 | 1.52 |
| 62 | 347.0395 | 2.04751  | 0.799432 | N-acetylglutamate                 | 0.26  | 0.53 | 0.47  | 0.19  | 0.21 | 1.07 | 0.92 | 0.36 |
| 63 | 135.0301 | 3.948531 | 0.850648 | acetyl-CoA                        | 0.12  | 0.55 | 1.77  | 1.34  | 0.04 | 2.12 | 2.55 | 2.32 |
| 64 | 112.4286 | 1.409344 | 0.858314 | arginine                          | 0.12  | 0.56 | 0.53  | 0.09  | 0.51 | 1.82 | 2.03 | 0.09 |
| 65 | 154.0611 | 1.914433 | 0.856739 | glutathione                       | 0.05  | 0.57 | 0.97  | 0.45  | 0.03 | 1.40 | 2.23 | 1.89 |
| 66 | 282.0861 | 1.459852 | 0.857308 | ornithine                         | -0.04 | 0.58 | 0.55  | -0.07 | 0.34 | 0.41 | 2.33 | 0.09 |
| 67 | 150.0411 | 2.037107 | 0.853763 | thymidine                         | 0.18  | 0.59 | 0.36  | -0.04 | 0.44 | 1.94 | 2.04 | 0.31 |
| 8  | 362.0511 | 1.499073 | 0.851382 | L-argininosuccinate               | -0.38 | 0.63 | 2.28  | 1.27  | 0.38 | 1.49 | 2.82 | 0.84 |
| 69 | 611.1408 | 2.658341 | 0.853422 | N-acetylglucosamine-1/6-phosphate | 0.02  | 0.67 | 0.51  | -0.14 | 0.21 | 2.95 | 2.74 | 0.61 |
| 70 | 306.0765 | 1.728165 | 0.823201 | N-carbamoyl-L-aspartate           | 0.61  | 0.73 | 0.23  | 0.11  | 0.87 | 0.40 | 0.17 | 0.02 |
| 71 | 145.0607 | 2.06878  | 0.715853 | uridine                           | 0.12  | 0.75 | 0.56  | -0.06 | 0.21 | 2.06 | 1.65 | 0.42 |
| 72 | 259.022  | 1.509566 | 0.783648 | pyridoxine                        | -0.08 | 0.76 | 0.58  | -0.26 | 0.11 | 3.64 | 3.39 | 2.73 |
| 73 | 178.0714 | 1.853829 | 0.854485 | sn-glycerol-3-phosphate           | 0.08  | 0.83 | 0.36  | -0.39 | 0.00 | 2.49 | 1.50 | 1.29 |
| 74 | 177.0395 | 2.04771  | 0.750985 | xanthine                          | -0.02 | 0.84 | 0.62  | -0.24 | 0.23 | 2.54 | 2.09 | 1.04 |
| 75 | 313.0589 | 2.024257 | 0.820586 | citrate/isocitrate                | 0.48  | 0.85 | 0.79  | 0.42  | 0.68 | 1.42 | 1.53 | 1.24 |
| 76 | 109.5264 | 1.386311 | 0.855701 | adenosine 5-phosphosulfate        | 0.31  | 0.85 | 0.50  | -0.04 | 0.53 | 2.48 | 2.30 | 0.33 |
| 77 | 338.989  | 1.485925 | 0.818313 | O-acetyl-L-serine                 | -0.14 | 0.93 | 0.85  | -0.22 | 0.73 | 3.92 | 3.35 | 1.01 |
| 78 | 455.1014 | 6.339029 | 0.859511 | 2,3-dihydroxybenzoic acid         | -1.45 | 0.94 | -0.60 | -2.99 | 2.03 | 1.58 | 1.11 | 3.67 |
| 79 | 784.1508 | 1.505536 | 0.850999 | cytidine                          | -0.05 | 0.96 | 0.86  | -0.15 | 0.01 | 4.59 | 3.03 | 0.30 |
| 80 | 321.0496 | 1.780281 | 0.860946 | malate                            | -0.10 | 0.99 | 0.15  | -0.95 | 0.12 | 1.90 | 0.05 | 4.07 |
| 81 | 346.0558 | 1.441355 | 0.856271 | lysine                            | 1.42  | 1.02 | -0.06 | 0.34  | 1.83 | 1.76 | 0.14 | 1.05 |
| 82 | 686.1423 | 1.567711 | 0.853065 | lipoate                           | 0.04  | 1.08 | 0.61  | -0.43 | 0.38 | 3.09 | 2.51 | 2.90 |
| 83 | 251.0776 | 4.043802 | 0.84958  | FAD                               | -0.14 | 1.11 | 0.56  | -0.69 | 0.23 | 3.17 | 0.87 | 1.06 |
| 84 | 250.0937 | 2.100759 | 0.846352 | NADP+                             | 0.30  | 1.11 | 1.08  | 0.27  | 0.04 | 0.65 | 1.58 | 0.25 |
| 85 | 386.0172 | 1.486119 | 0.856649 | D-gluconate                       | -0.02 | 1.15 | 1.23  | 0.05  | 0.30 | 2.63 | 3.13 | 0.20 |

|     |          |          |          |                                            |       |       |       |        |      |      |      |         |
|-----|----------|----------|----------|--------------------------------------------|-------|-------|-------|--------|------|------|------|---------|
| 86  | 289.0352 | 1.507047 | 0.851621 | 2-dehydro-D-gluconate                      | -0.21 | 1.28  | 1.75  | 0.27   | 0.04 | 2.48 | 1.42 | 0.27    |
| 87  | 258.0375 | 1.453563 | 0.828056 | histidine                                  | 0.30  | 1.30  | 1.00  | 0.01   | 0.46 | 2.73 | 3.55 | 0.11    |
| 88  | 195.0502 | 2.024109 | 0.852796 | dTMP                                       | -0.94 | 1.31  | 1.59  | -0.66  | 1.19 | 1.38 | 2.20 | 1.03    |
| 89  | 199.0007 | 1.550444 | 0.856554 | homoserine                                 | -2.41 | 1.32  | -1.46 | -5.18  | 0.76 | 0.25 | 0.97 | 1.45    |
| 90  | 242.078  | 2.027355 | 0.788688 | glucono- $\delta$ -lactone                 | 0.47  | 1.33  | 1.05  | 0.18   | 0.65 | 2.37 | 1.75 | 0.20    |
| 91  | 239.0147 | 1.507822 | 0.829343 | myo-inositol                               | -0.17 | 1.38  | 1.11  | -0.44  | 0.91 | 4.50 | 3.63 | 1.23    |
| 92  | 221.0598 | 1.489268 | 0.854986 | citrulline                                 | -0.20 | 1.46  | 1.22  | -0.43  | 0.35 | 3.66 | 2.77 | 1.07    |
| 93  | 328.0454 | 3.954113 | 0.838432 | succinyl-CoA/methylmalonyl-CoA             | -0.26 | 1.66  | 1.51  | -0.42  | 0.34 | 1.03 | 2.36 | 0.81    |
| 94  | 689.0877 | 2.038819 | 0.852447 | cyclic bis(3 $\rightarrow$ 5-) dimeric GMP | -0.18 | 1.68  | 1.61  | -0.24  | 2.83 | 3.02 | 2.29 | 0.14    |
| 95  | 766.1091 | 1.525817 | 0.835367 | Phenylpropionic acid                       | 0.14  | 1.75  | 1.23  | -0.37  | 0.00 | 0.58 | 1.85 | 0.47    |
| 96  | 322.0445 | 3.260484 | 0.848054 | coenzyme A                                 | -1.70 | 1.77  | 1.48  | -1.99  | 1.48 | 2.14 | 1.76 | 3.87    |
| 97  | 174.0874 | 1.793035 | 0.851756 | D-erythrose-4-phosphate                    | 0.19  | 1.89  | 1.83  | 0.14   | 0.42 | 1.66 | 1.94 | 0.01    |
| 98  | 191.019  | 1.979981 | 0.851608 | Methylcysteine                             | 0.95  | 2.07  | 1.70  | 0.58   | 0.58 | 1.09 | 0.71 | 0.54    |
| 99  | 341.1089 | 1.499742 | 0.852927 | S-ribosyl-L-homocysteine-negate            | 0.12  | 2.14  | 0.40  | -1.63  | 0.11 | 2.81 | 0.72 | 1.16    |
| 100 | 243.0804 | 1.504422 | 0.852072 | deoxyinosine                               | 0.31  | 2.21  | 1.33  | -0.57  | 0.79 | 2.89 | 2.21 | 0.13    |
| 101 | 116.0711 | 1.985581 | 0.85367  | NADH                                       | -2.59 | 2.54  | 3.62  | -1.52  | 1.44 | 0.68 | 3.51 | 0.63    |
| 102 | 132.0291 | 1.759809 | 0.850709 | trehalose-6-Phosphate                      | 2.73  | 2.56  | 0.30  | 0.47   | 3.62 | 3.26 | 0.95 | 2.36    |
| 103 | 131.045  | 1.46988  | 0.853972 | deoxyadenosine                             | 0.33  | 2.69  | 1.93  | -0.43  | 0.47 | 4.44 | 2.27 | 0.21    |
| 104 | 173.1035 | 1.516454 | 0.850518 | D-glucosamine-6-phosphate                  | 0.68  | 2.77  | 1.61  | -0.49  | 0.69 | 1.86 | 0.67 | 0.30    |
| 105 | 160.0605 | 1.466613 | 0.852018 | glucosamine                                | 0.42  | 2.83  | 2.92  | 0.51   | 0.89 | 3.49 | 2.96 | 0.18    |
| 106 | 426.0121 | 2.080937 | 0.848104 | NAD <sup>+</sup>                           | -0.69 | 3.58  | 2.11  | -2.15  | 0.07 | 2.46 | 0.79 | 1.78    |
| 107 | 266.091  | 1.819532 | 0.852153 | Pyrophosphate                              | 0.22  | 4.02  | 3.37  | -0.43  | 0.55 | 5.90 | 4.13 | 0.82    |
| 108 | 187.108  | 1.889188 | 0.850813 | Uric acid                                  | -0.31 | 4.32  | 3.55  | -1.08  | 0.17 | 4.38 | 2.87 | 0.74    |
| 109 | 808.1196 | 2.336574 | 0.830013 | dephospho-CoA                              | -1.36 | 11.89 | 2.10  | -11.15 | 1.16 | 1.83 | 1.11 | 0.44    |
| 110 | 145.0132 | 2.367599 | 0.838086 | Cystine                                    | 1.04  | 12.24 | 11.20 | 0.00   | 2.09 | 7.53 | 1.86 | 0.43    |
| 111 | 153.0182 | 1.50954  | 0.803857 | S-adenosyl-L-homoCysteine                  | -0.86 | 12.98 | 13.85 | 0.00   | 1.67 | 8.01 | 6.35 | #DIV/0! |
| 112 | 175.0602 | 1.598831 | 0.850469 | prephenate                                 | 0.46  | 13.61 | 13.14 | 0.00   | 0.07 | 5.34 | 1.52 | 0.75    |

|     |          |         |          |           |      |       |      |        |      |      |      |      |
|-----|----------|---------|----------|-----------|------|-------|------|--------|------|------|------|------|
| 113 | 193.0346 | 1.51109 | 0.831777 | guanosine | 0.08 | 14.42 | 1.34 | -13.00 | 0.45 | 1.36 | 2.89 | 1.14 |
|-----|----------|---------|----------|-----------|------|-------|------|--------|------|------|------|------|

**Key:** med Mz: Median  $m/z$  for metabolites, medRt: Median Retention Time, Max Quality: quality of peaks detected, compound: Metabolite, CSH4 - WG350:  $\log_2$  of fold change and between CSH4 and WG350, CSH4 - CSH4 (S):  $\log_2$  of fold change between CSH4 and CSH4 salt, WG350 - WG350 (S):  $\log_2$  of fold change between WG350 and WG350 salt, CSH4 (S)- WG350 (S):  $\log_2$  of fold change between CSH4 salt and WG350 salt

**Table S2: Concentration of metabolites added to LB to measure effect of metabolites on Fluorescence *in vivo* (Related to Figure 6)**

| S. no. | Metabolite | Concentration (mM) |
|--------|------------|--------------------|
| 1      | Alanine    | 200                |
| 2      | Betaine    | 200                |
| 3      | Proline    | 200                |
| 4      | Serine     | 200                |
| 5      | TMAO       | 200                |
| 6      | Malate     | 100                |
| 7      | Malonate   | 100                |
| 8      | Fumarate   | 100                |
| 9      | Succinate  | 100                |
| 10     | KCL        | 350                |
| 11     | NaCl       | 350                |
| 12     | Sucrose    | 400                |
| 13     | Sorbitol   | 400                |
